# Supplementary material for: Kinase Inhibitors as Potential Therapeutic Agents in the Treatment of COVID-19
Source: Front Pharmacol. 2022 Apr 4;13:806568. doi: 10.3389/fphar.2022.806568 (PMC9014181; doi:10.3389/fphar.2022.806568)
Supplement: Supplementary file 2 [file DataSheet1.xlsx]

## Sheet: Covid-TKI-ClinicalTrial.gov
T	NCT Number	Title	Acronym	Status	Study Results	Conditions	Interventions	Outcome Measures	Sponsor/Collaborators	Gender	Age	Phases	Enrollment	Funded Bys	Study Type	Study Designs	Other IDs	Start Date	Primary Completion Date	Completion Date	First Posted	Results First Posted	Last Update Posted	Locations	Study Documents	URL
1	NCT04419623	A Study of TL-895 With Standard Available Treatment Versus Standard Available Treatment for the Treatment of COVID-19 in Patients With Cancer		Completed	No Results Available	COVID-19|Sars-CoV2|Cancer|Solid Tumor|Carcinoma|Blood Cancer	Drug: TL-895	Recommended dose of TL-895	Telios Pharma, Inc.	All	18 Years and older Â (Adult, Older Adult)	Phase 1	7	Industry	Interventional	Allocation: N/A|Intervention Model: Single Group Assignment|Masking: None (Open Label)|Primary Purpose: Treatment	TL-895-202	July 9, 2020	September 22, 2020	December 15, 2020	June 5, 2020		May 12, 2021	Georgia Cancer Center, Augusta, Georgia, United States|The Ohio State Comprehensive Cancer Center, Columbus, Ohio, United States		https://ClinicalTrials.gov/show/NCT04419623
2	NCT04528667	Study of the Safety and Efficacy of STI-5656 (Abivertinib Maleate) in Subjects Hospitalized Due to COVID-19		Completed	No Results Available	Covid19	Drug: STI-5656|Drug: Placebo	Proportion of subjects discharged from hospital|Incidence of adverse events (safety)|Time to hospital admission, treatment, and discharge|Number of days hospitalized|Change in clinical status as assessed using a 0-8 ordinal scale|Change in RT-PCR test results|Change in C-reactive protein levels|AUC of STI-5656 (PK)|Cmax of STI-5656 (PK)|tÂ½ of STI-5656 (PK)|Change in cytokine levels|Tmax of STI-5…	Sorrento Therapeutics, Inc.	All	18 Years and older Â (Adult, Older Adult)	Phase 2	396	Industry	Interventional	Allocation: Randomized|Intervention Model: Parallel Assignment|Masking: Double (Participant, Investigator)|Primary Purpose: Treatment	BTK-COV-202BR	January 6, 2021	August 23, 2021	October 7, 2021	August 27, 2020		November 3, 2021	Hospital e Maternidade ChristovÃ£o da Gama, Santo AndrÃ©, SP, Brazil		https://ClinicalTrials.gov/show/NCT04528667
3	NCT04440007	Study of the Efficacy and Safety of STI-5656 (Abivertinib Maleate) in Subjects Hospitalized With COVID-19	SOC	Completed	No Results Available	Covid-19	Drug: Abivertinib|Other: Standard of Care	Proportion of subjects alive and free of respiratory failure at Day 28|Incidence of treatment-emergent adverse events (safety and tolerability of STI-5656)|Proportion of subjects alive and free of respiratory failure at Day 60|Change in clinical status|Discharge from ICU|Time to respiratory failure or death|Change in CRP|Change from baseline in oxygenation index|All-cause mortality at Day 60 and …	Sorrento Therapeutics, Inc.	All	18 Years and older Â (Adult, Older Adult)	Phase 2	92	Industry	Interventional	Allocation: Randomized|Intervention Model: Parallel Assignment|Masking: None (Open Label)|Primary Purpose: Treatment	STI-5656-2001	October 9, 2020	July 1, 2021	August 23, 2021	June 19, 2020		November 3, 2021	MedStar Washington Hospital Center, Washington, District of Columbia, United States|Teradan Clinical Trials, Brandon, Florida, United States|Alexandria Cardiology Clinic, Alexandria, Louisiana, United States|Clinical Trials of SWLA, Lake Charles, Louisiana, United States|Quality Clinical Research, Omaha, Nebraska, United States|Memorial Hermann Memorial City Hospital, Houston, Texas, United States		https://ClinicalTrials.gov/show/NCT04440007
4	NCT04665115	Ibrutinib for the Treatment of Patients With B-Cell Malignancies Who Are Infected With Coronavirus Disease 2019 (COVID-19)		Withdrawn	No Results Available	Asymptomatic COVID-19 Infection Laboratory-Confirmed|B-Cell Neoplasm|Chronic Lymphocytic Leukemia|Chronic Lymphocytic Leukemia/Small Lymphocytic Lymphoma|Mantle Cell Lymphoma|Marginal Zone Lymphoma|Small Lymphocytic Lymphoma|Symptomatic COVID-19 Infection Laboratory-Confirmed|Waldenstrom Macroglobulinemia	Drug: Ibrutinib|Other: Quality-of-Life Assessment	Proportion of patients who require hospitalization for their COVID-19 disease or die (Cohort 1)|Proportion of patients who require mechanical ventilation and/or die (Cohort 2)|Rate of "flare phenomena" (Cohort I)|Patient-reported health and symptom status (Cohort I)|Patterns on ibrutinib therapy during COVID-19 infection (Cohort I)|Reasons for hospitalization (Cohort I)|Mortality (Cohort II)|Time…	Academic and Community Cancer Research United|National Cancer Institute (NCI)	All	18 Years and older Â (Adult, Older Adult)	Phase 2	0	Other|NIH	Interventional	Allocation: Randomized|Intervention Model: Parallel Assignment|Masking: None (Open Label)|Primary Purpose: Treatment	ACCRU-LY-2001|NCI-2020-11785|P30CA015083	2021-12-01	May 1, 2022	May 1, 2025	December 11, 2020		December 15, 2021	Mayo Clinic in Rochester, Rochester, Minnesota, United States		https://ClinicalTrials.gov/show/NCT04665115
5	NCT04581954	Inflammatory Signal Inhibitors for COVID-19 (MATIS)	MATIS	Recruiting	No Results Available	Coronavirus|Covid19|Pneumonia	Drug: Ruxolitinib|Drug: Fostamatinib|Other: Standard of care	All-cause mortality|Number and proportion of patients requiring invasive ventilation|Number and proportion of patients requiring non-invasive ventilation (CPAP and high flow nasal oxygen)|Number and proportion of patients requiring invasive ventilation or extracorporeal membrane oxygenation (ECMO)|Number and proportion of patients requiring non-invasive ventilation including continuous positive a…	Imperial College London|Imperial College Healthcare NHS Trust|Rigel Pharmaceuticals|Novartis	All	18 Years and older Â (Adult, Older Adult)	Phase 1|Phase 2	456	Other|Industry	Interventional	Allocation: Randomized|Intervention Model: Parallel Assignment|Masking: Single (Outcomes Assessor)|Primary Purpose: Treatment	20HH5926|2020-001750-22	October 2, 2020	December 1, 2021	December 1, 2021	October 9, 2020		September 2, 2021	Imperial College Healthcare NHS Trust, London, United Kingdom		https://ClinicalTrials.gov/show/NCT04581954
6	NCT04924660	Novel Experimental COVID-19 Therapies Affecting Host Response	NECTAR	Recruiting	No Results Available	COVID-19|SARS-CoV-2 Infection|Coronavirus Infection	Drug: TXA127|Drug: TRV027|Drug: Placebo|Drug: Fostamatinib	Oxygen free days through day 28.|In-hospital mortality|Alive and oxygen free at Day 14|Alive and oxygen free at Day 28|Alive and free of new invasive mechanical ventilation at day 28|28-day mortality|60-day mortality|90-day mortality|Clinical status assessed using World Health Organization (WHO) 8-point ordinal scale at Day 14|Clinical status assessed using WHO 8-point ordinal scale at Day 28|Cli…	Vanderbilt University Medical Center|National Institutes of Health (NIH)|National Heart, Lung, and Blood Institute (NHLBI)	All	18 Years and older Â (Adult, Older Adult)	Phase 2|Phase 3	1600	Other|NIH	Interventional	Allocation: Randomized|Intervention Model: Parallel Assignment|Masking: Quadruple (Participant, Care Provider, Investigator, Outcomes Assessor)|Primary Purpose: Treatment	210982	July 15, 2021	May 31, 2023	December 30, 2023	June 14, 2021		February 8, 2022	University of Alabama Birmingham, Birmingham, Alabama, United States|Chandler Regional Medical Center, Chandler, Arizona, United States|Los Angeles County University of Southern California Medical Center, Los Angeles, California, United States|University of Southern California, Los Angeles, California, United States|Cedars-Sinai Medical Center, Los Angeles, California, United States|UCSF Medical …		https://ClinicalTrials.gov/show/NCT04924660
7	NCT04564040	A Study in Healthy Subjects to Assess Bioavailability (Proportion of a Drug Which Enters the Circulation to Have an Active Effect) of Acalabrutinib Tablet and Protonpump Inhibitor Effect (Members of a Class of Medications That Inhibits in Gastric Acid Production) for Rabeprazole		Completed	No Results Available	Mantle Cell Lymphoma|COVID-19	Drug: Acalabrutinib Treatment A|Drug: Acalabrutinib Treatment B|Drug: Acalabrutinib Treatment C|Drug: Acalabrutinib Treatment D	Part 1 and 2: Area under plasma concentration-time curve from time zero to infinity (AUCinf)|Part 1 and 2: Area under the plasma concentration time curve from time zero to time of last quantifiable concentration (AUClast)|Part 1 and Part 2: Maximum observed plasma concentration (Cmax)|Part 1 and Part 2: Area under the plasma concentration-time curve from time zero to 24 hours post dose (AUC0-24)|…	AstraZeneca|Parexel	All	18 Years to 55 Years Â (Adult)	Phase 1	20	Industry	Interventional	Allocation: Randomized|Intervention Model: Crossover Assignment|Masking: None (Open Label)|Primary Purpose: Treatment	D8223C00005	October 12, 2020	December 11, 2020	December 11, 2020	September 25, 2020		December 29, 2020	Research Site, Berlin, Germany		https://ClinicalTrials.gov/show/NCT04564040
8	NCT05238467	Immunological Responses of COVID-19 Vaccination		Recruiting	No Results Available	Cancer; Chemotherapy	Other: COVID antibody titers in the blood	Seroprotection rate|Seroconversion rate	University Hospitals Cleveland Medical Center	All	18 Years and older Â (Adult, Older Adult)		100	Other	Observational	Observational Model: Cohort|Time Perspective: Prospective	CASE 3Y21	May 21, 2021	December 31, 2022	June 30, 2023	February 14, 2022		February 14, 2022	University Hospitals Cleveland Medical Center, Cleveland, Ohio, United States		https://ClinicalTrials.gov/show/NCT05238467

## Sheet: Baricitinib
Rank	NCT Number	Title	Acronym	Status	Study Results	Conditions	Interventions	Outcome Measures	Sponsor/Collaborators	Gender	Age	Phases	Enrollment	Funded Bys	Study Type	Study Designs	Other IDs	Start Date	Primary Completion Date	Completion Date	First Posted	Results First Posted	Last Update Posted	Locations	Study Documents	URL
1	NCT04340232	Safety and Efficacy of Baricitinib for COVID-19		Withdrawn	No Results Available	COVID-19	Drug: Baricitinib	Phase 2: Cumulative incidence of Grade 3 and 4 adverse events (AEs)|Phase 2: Cumulative incidence of serious adverse events (SAEs)|Phase 2: Changes in white blood cell count (CBC) through Day 15|Phase 2: Changes in hemoglobin through Day 15|Phase 2: Changes in platelets through Day 15|Phase 2: Changes in creatinine through Day 15|Phase 2: Changes in glucose through Day 15|Phase 2: Changes in prot…	University of Colorado, Denver	All	18 Years to 89 Years Â (Adult, Older Adult)	Phase 2|Phase 3	0	Other	Interventional	Allocation: N/A|Intervention Model: Single Group Assignment|Masking: None (Open Label)|Primary Purpose: Treatment	20-0738	2021-03-01	2021-08-01	2021-10-01	April 9, 2020		March 8, 2021	University of Colorado, Denver, Aurora, Colorado, United States		https://ClinicalTrials.gov/show/NCT04340232
2	NCT05082714	Tocilizumab Versus Baricitinib in Patients With Severe COVID-19		Recruiting	No Results Available	COVID-19	Drug: Tocilizumab|Drug: Baricitinib	Mechanical ventilation or death by day 28|Time to discharge over the 28-day period|World Health Organization scale at day 10 [range from 0 (not infected) to 10 (dead)]	University Hospital of Patras	All	18 Years and older Â (Adult, Older Adult)	Not Applicable	164	Other	Interventional	Allocation: Randomized|Intervention Model: Parallel Assignment|Masking: None (Open Label)|Primary Purpose: Treatment	ATTKPATRASCOVID19	October 18, 2021	2022-04-01	2022-04-01	October 19, 2021		November 30, 2021	University Hospital of Patras, Department of Respiratory Medicine, Patras, Greece		https://ClinicalTrials.gov/show/NCT05082714
3	NCT04421027	A Study of Baricitinib (LY3009104) in Participants With COVID-19	COV-BARRIER	Completed	No Results Available	COVID-19	Drug: Baricitinib|Drug: Placebo	Percentage of Participants who Die or Require Non-Invasive Ventilation/High-Flow Oxygen or Invasive Mechanical Ventilation (including extracorporeal membrane oxygenation [ECMO])|Percentage of Participants with at Least 1-Point Improvement on NIAID-OS or Live Discharge from Hospital|Number of Ventilator-Free Days|Time to Recovery|Overall Improvement on the NIAID-OS|Duration of Hospitalization|Perc…	Eli Lilly and Company	All	18 Years and older Â (Adult, Older Adult)	Phase 3	1585	Industry	Interventional	Allocation: Randomized|Intervention Model: Parallel Assignment|Masking: Double (Participant, Investigator)|Primary Purpose: Treatment	17830|I4V-MC-KHAA|2020-001517-21	June 12, 2020	February 12, 2021	June 10, 2021	June 9, 2020		July 19, 2021	Dignity Health Mercy Gilbert Medical Center, Gilbert, Arizona, United States|Valleywise Health, Phoenix, Arizona, United States|St Joseph's Hospital and Medical Center, Phoenix, Arizona, United States|Hoag Memorial Hospital Presbyterian, Newport Beach, California, United States|Sharp Memorial Hospital, San Diego, California, United States|San Francisco VA Medical Center, San Francisco, California…		https://ClinicalTrials.gov/show/NCT04421027
4	NCT04970719	Baricitinib in Hospitalized Covid-19 Patients With Diabetes Mellitus		Recruiting	No Results Available	COVID-19 Pneumonia	Drug: Baricitinib|Drug: Dexamethasone|Drug: Remdesivir	Rescue treatment|Death or invasive mechanical ventilation|C-reactive protein (CRP)|lactate dehydrogenase (LDH)|Ferritin|Creatinine|alanine aminotransferase (ALT)|d-dimer concentration|fasting blood glucose (FBS)|hemoglobin|platelets|white blood cell count (WBC)|total lymphocyte count|adverse events (AEs)|serious adverse events (SAEs)|invasive mechanical ventilation|non-invasive ventilation/high f…	Bangladesh Institute of Research and Rehabilitation in Diabetes, Endocrine and Metabolic Disorders	All	18 Years and older Â (Adult, Older Adult)	Phase 3	382	Other	Interventional	Allocation: Randomized|Intervention Model: Parallel Assignment|Masking: None (Open Label)|Primary Purpose: Treatment	BADAS-ERC/EC/21/00311	July 10, 2021	2021-12-01	2021-12-01	July 21, 2021		August 27, 2021	Debidwar Upazila Health Complex, Comilla, Bangladesh|BIRDEM General Hospital, Dhaka, Bangladesh|Mugda Medical College and Hospital, Dhaka, Bangladesh|Kurmitola General Hospital, Dhaka, Bangladesh|Kurigram Adhunik Sadar Hospital, Kurigram, Bangladesh|Rajshahi Medical College & Hospital, Rajshahi, Bangladesh|Dedicated Corona Isolation Hospital (DCIH), Rangpur, Bangladesh		https://ClinicalTrials.gov/show/NCT04970719
5	NCT05056558	Efficacy and Safety of Baricitinib in Patients With Moderate and Severe COVID-19		Not yet recruiting	No Results Available	Covid19	Drug: Baricitinib|Drug: Placebo	Clinical status assessed by a 7-point ordinal scale on Day 14|The proportion of participants with treatment emergent adverse events	Incepta Pharmaceuticals Ltd	All	18 Years to 80 Years Â (Adult, Older Adult)	Phase 3	480	Industry	Interventional	Allocation: Randomized|Intervention Model: Parallel Assignment|Masking: Triple (Participant, Care Provider, Investigator)|Primary Purpose: Treatment	2021/BR8/P3/01	2021-10-01	2022-04-01	2022-09-01	September 24, 2021		September 28, 2021	Dhaka Medical College, Mugda Medical College, Kuwait Bangladesh Friendship Government Hospital, Dhaka, Bangladesh		https://ClinicalTrials.gov/show/NCT05056558
6	NCT04358614	Baricitinib Therapy in COVID-19		Completed	No Results Available	COVID|Pneumonia	Drug: Baricitinib 4 MG Oral Tablet	To assess the safety of baricitinib combined with antiviral (lopinavir-ritonavir) in terms of serious or non-serious adverse events incidence rate.|To evaluate the impact of baricitinib in terms of clinical, laboratory, respiratory parameters.|ICU admission rate|Discharge rate.	Fabrizio Cantini|Hospital of Prato	All	18 Years to 85 Years Â (Adult, Older Adult)	Phase 2|Phase 3	12	Other	Interventional	Allocation: Non-Randomized|Intervention Model: Crossover Assignment|Masking: None (Open Label)|Primary Purpose: Treatment	HPrato-4	March 16, 2020	April 5, 2020	April 7, 2020	April 24, 2020		April 24, 2020	Fabrizio Cantini, Prato, Tuscany, Italy		https://ClinicalTrials.gov/show/NCT04358614
7	NCT04373044	Baricitinib, Placebo and Antiviral Therapy for the Treatment of Patients With Moderate and Severe COVID-19		Terminated	No Results Available	Symptomatic COVID-19 Infection Laboratory-Confirmed	Drug: Baricitinib|Drug: Hydroxychloroquine|Drug: Placebo Administration	Proportion of patients requiring invasive mechanical ventilation or dying|Identification of clinical features (vitals signs - body temperature)|Identification of clinical features (vital signs - respiratory rate)|Identification of clinical features (vital signs - heart rate)|Identification of clinical features (vital signs - blood pressure)|Identification of clinical features (Imaging)|Identifica…	University of Southern California|National Cancer Institute (NCI)	All	18 Years and older Â (Adult, Older Adult)	Phase 2	6	Other|NIH	Interventional	Allocation: Randomized|Intervention Model: Parallel Assignment|Masking: Double (Participant, Investigator)|Primary Purpose: Treatment	0S-20-3|NCI-2020-02685|P30CA014089	May 1, 2020	May 12, 2021	May 12, 2021	May 4, 2020		May 26, 2021	Los Angeles County-USC Medical Center, Los Angeles, California, United States|USC / Norris Comprehensive Cancer Center, Los Angeles, California, United States		https://ClinicalTrials.gov/show/NCT04373044
8	NCT04693026	Efficacy of Ramdicivir and Baricitinib for the Treatment of Severe COVID 19 Patients		Recruiting	No Results Available	Covid19|Covid-19 ARDS	Drug: Remdesivir|Drug: Baricitinib|Drug: Tocilizumab	Time to Clinical Improvement (TTCI)|Mortality Rate|Duration of ICU stay|Duration total hospital stay|Rate of daily Supplemental Oxygen Use|Time to Clinical Failure	M Abdur Rahim Medical College and Hospital|First affiliated Hospital Xi'an Jiaoting University	All	Child, Adult, Older Adult	Phase 3	150	Other	Interventional	Allocation: Randomized|Intervention Model: Parallel Assignment|Masking: None (Open Label)|Primary Purpose: Treatment	M.A.R.M.C.D./2020/2637	September 10, 2020	February 15, 2021	March 5, 2021	January 5, 2021		January 5, 2021	M. Abdur Rahim Medical College Hospital, Dinajpur, Bangladesh		https://ClinicalTrials.gov/show/NCT04693026
9	NCT05074420	A Study of Baricitinib (LY3009104) in Children With COVID-19 (COV-BARRIER-PEDS)	COV-BARRIER	Recruiting	No Results Available	Covid19|Corona Virus Infection	Drug: Baricitinib	Pharmacokinetics (PK): Area Under Concentration Curve (AUC) of Baricitinib|PK: Maximum Concentration (Cmax) of Baricitinib|Percentage of Participants Who Require Noninvasive Ventilation/high-flow oxygen or Invasive Mechanical Ventilation (including extracorporeal membrane oxygenation [ECMO])|Percentage of Participants Who Die or Require Non-Invasive Ventilation/High-Flow Oxygen or Invasive Mechan…	Eli Lilly and Company	All	2 Years to 18 Years Â (Child, Adult)	Phase 3	24	Industry	Interventional	Allocation: N/A|Intervention Model: Single Group Assignment|Masking: None (Open Label)|Primary Purpose: Treatment	18253|I4V-MC-KHAB|2021-001338-21	December 21, 2021	July 4, 2022	August 30, 2022	October 12, 2021		January 19, 2022	Arnold Palmer Hospital for Children, Orlando, Florida, United States|St. Luke's Boise Medical Center, Boise, Idaho, United States|University Hospitals Cleveland Medical Center, Cleveland, Ohio, United States|University of Texas Medical Branch, Galveston, Texas, United States|MultiCare Health System, Tacoma, Washington, United States|Centre Hospitalier Regional de la Citadelle, LiÃ¨ge, Belgium|Hos…		https://ClinicalTrials.gov/show/NCT05074420
10	NCT04832880	Factorial Randomized Trial of Rendesivir and Baricitinib Plus Dexamethasone for COVID-19 (the AMMURAVID Trial)	AMMURAVID	Not yet recruiting	No Results Available	Covid19	Drug: Baricitinib Oral Tablet [Olumiant]|Drug: Remdesivir|Drug: Dexamethasone	Prevention of very severe respiratory failure or mortality|Prevention of mortality|Prevention of very severe respiratory failure|Incidence of Adeverse Events|Incidence of bacterial/fungal infections|Reduction of the requirements of orotracheal intubation/ECMO|Evolution of the NEWS-2 score|Evolution of the MELD score|Velocity in clinical improvement|Velocity in discharge|Fever disappearance|Change…	ASST Fatebenefratelli Sacco	All	18 Years and older Â (Adult, Older Adult)	Phase 3	4000	Other	Interventional	Allocation: Randomized|Intervention Model: Parallel Assignment|Masking: None (Open Label)|Primary Purpose: Treatment	The AMMURAVID trial|2020-001854-23	April 6, 2021	2022-03-01	2022-12-01	April 6, 2021		April 6, 2021	Ospedali Riuniti delle Marche, Ancona, Italy|Ospedale Parini, Aosta, Italy|Ospedale SS Annunziata -Chieti, Chieti, Italy|Ospedale S Anna, Como, Italy|Ospedale di Ferrara, Ferrara, Italy|Ospedale di Firenze and Empoli, Firenze, Italy|Ospedali Galliera, Genova, Italy|H Goretti, Latina, Italy|Ospedale Manzoni, Lecco, Italy|Ospedale di Legnago, Legnago, Italy|Ospedale di Legnano, Legnano, Italy|ASST …		https://ClinicalTrials.gov/show/NCT04832880
11	NCT04362943	Clinical-epidemiological Characterization of COVID-19 Disease in Hospitalized Older Adults	COVID-AGE	Completed	No Results Available	COVID-19	Drug: Baricitinib or Anakinra	Mortality|X-ray changes|Disability changes|Ambulation changes|lymphocyte count changes|C-Reactive Protein changes|Ferritin changes|D-Dimer changes	Complejo Hospitalario Universitario de Albacete	All	70 Years and older Â (Older Adult)		576	Other	Observational	Observational Model: Other|Time Perspective: Retrospective	PAS-BAR-2020-04	April 20, 2020	April 15, 2021	April 15, 2021	April 27, 2020		July 28, 2021	Complejo Hospitalario Universitario de Albacete, Albacete, Spain		https://ClinicalTrials.gov/show/NCT04362943
12	NCT04393051	Baricitinib Compared to Standard Therapy in Patients With COVID-19	BARICIVID-19	Not yet recruiting	No Results Available	Covid-19|SARS-CoV 2|SARS Pneumonia	Drug: Baricitinib Oral Tablet	Need of invasive mechanical ventilation|Mortality|Time to invasive mechanical ventilation|Time to independence from non-invasive mechanical ventilation|Time to independence from oxygen therapy|Time to improvement in oxygenation for at least 48 hours|Length of hospital stay|Length of ICU stay|Instrumental response|Proportion of adverse events	Azienda Ospedaliero, Universitaria Pisana	All	18 Years and older Â (Adult, Older Adult)	Phase 2	126	Other	Interventional	Allocation: Randomized|Intervention Model: Parallel Assignment|Masking: None (Open Label)|Primary Purpose: Treatment	BARICIVID-19	May 20, 2020	June 30, 2020	July 30, 2020	May 19, 2020		May 20, 2020	Azienda Ospedaliero Universitaria Pisana, Pisa, Italy		https://ClinicalTrials.gov/show/NCT04393051
13	NCT04346147	Clinical Trial to Evaluate Efficacy of 3 Types of Treatment in Patients With Pneumonia by COVID-19	Covid19COVINIB	Active, not recruiting	No Results Available	COVID-19 Pneumonia	Drug: Imatinib tablets|Drug: Baricitinib Oral Tablet|Other: Supportive tratment	time to clinical improvement|Safety of treatments|Tolerability of treatments	Hospital Universitario de Fuenlabrada|Centro Nacional de Investigaciones Oncologicas CARLOS III	All	18 Years and older Â (Adult, Older Adult)	Phase 2	168	Other	Interventional	Allocation: Randomized|Intervention Model: Parallel Assignment|Masking: None (Open Label)|Primary Purpose: Treatment	24032020	May 7, 2020	June 2, 2021	2021-09-01	April 15, 2020		August 3, 2021	Hospital Universitario de Fuenlabrada, Fuenlabrada, Madrid, Spain		https://ClinicalTrials.gov/show/NCT04346147
14	NCT04401579	Adaptive COVID-19 Treatment Trial 2 (ACTT-2)		Completed	Has Results	COVID-19	Other: Placebo|Drug: Remdesivir|Drug: Baricitinib	Time to Recovery|Change From Baseline in Alanine Transaminase (ALT)|Change From Baseline in Aspartate Transaminase (AST)|Change From Baseline in Creatinine|Change From Baseline in Glucose|Change From Baseline in Hemoglobin|Change From Baseline in Platelets|Change From Baseline in Prothrombin International Normalized Ratio (INR)|Change From Baseline in Total Bilirubin|Change From Baseline in White…	National Institute of Allergy and Infectious Diseases (NIAID)	All	18 Years to 99 Years Â (Adult, Older Adult)	Phase 3	1033	NIH	Interventional	Allocation: Randomized|Intervention Model: Parallel Assignment|Masking: Double (Participant, Investigator)|Primary Purpose: Treatment	20-0006 ACTT-2	May 8, 2020	July 31, 2020	July 31, 2020	May 26, 2020	April 26, 2021	April 26, 2021	University of Alabama at Birmingham School of Medicine - Infectious Disease, Birmingham, Alabama, United States|University of California San Diego Health - Jacobs Medical Center, La Jolla, California, United States|University of California Los Angeles Medical Center - Westwood Clinic, Los Angeles, California, United States|University of California Irvine Medical Center - Infectious Disease, Orang…	"Study Protocol", https://ClinicalTrials.gov/ProvidedDocs/79/NCT04401579/Prot_002.pdf|"Statistical Analysis Plan", https://ClinicalTrials.gov/ProvidedDocs/79/NCT04401579/SAP_003.pdf|"Informed Consent Form", https://ClinicalTrials.gov/ProvidedDocs/79/NCT04401579/ICF_001.pdf	https://ClinicalTrials.gov/show/NCT04401579
15	NCT04320277	Baricitinib in Symptomatic Patients Infected by COVID-19: an Open-label, Pilot Study.	BARI-COVID	Not yet recruiting	No Results Available	Pharmacological Action	Drug: Baricitinib	The percentage of patients requiring transfer to ICU as compared with the rate of transfers observed in controls.|The percentage of patients achieving the remission; CRP, IL-6 and TNFÎ± values at baseline and during the treatment course; the number of AEs.	Hospital of Prato	All	18 Years to 85 Years Â (Adult, Older Adult)	Phase 2|Phase 3	200	Other	Interventional	Allocation: Non-Randomized|Intervention Model: Crossover Assignment|Masking: None (Open Label)|Primary Purpose: Treatment	HPrato-3	May 16, 2020	June 30, 2020	July 30, 2020	March 24, 2020		April 22, 2020	Fabrizio Cantini, Prato, Tuscany, Italy		https://ClinicalTrials.gov/show/NCT04320277
16	NCT04640168	Adaptive COVID-19 Treatment Trial 4 (ACTT-4)		Completed	No Results Available	COVID-19	Drug: Baricitinib|Drug: Dexamethasone|Other: Placebo|Drug: Remdesivir	The proportion of subjects not meeting criteria for one of the following two ordinal scale categories at any time: 8) Death; 7) Hospitalized, on invasive mechanical ventilation or extracorporeal membrane oxygenation (ECMO)|Change from baseline in alanine aminotransferase (ALT)|Change from baseline in aspartate aminotransferase (AST)|Change from baseline in C-reactive protein (CRP)|Change from bas…	National Institute of Allergy and Infectious Diseases (NIAID)	All	18 Years to 99 Years Â (Adult, Older Adult)	Phase 3	4074	NIH	Interventional	Allocation: Randomized|Intervention Model: Parallel Assignment|Masking: Double (Participant, Investigator)|Primary Purpose: Treatment	20-0006 ACTT-4	November 24, 2020	May 18, 2021	June 18, 2021	November 23, 2020		November 17, 2021	University of Alabama at Birmingham School of Medicine - Infectious Disease, Birmingham, Alabama, United States|UCSF Fresno Center for Medical Education and Research - Clinical Research Center, Fresno, California, United States|University of California San Diego Health - Jacobs Medical Center, La Jolla, California, United States|University of California Los Angeles Medical Center - Westwood Clini…	"Informed Consent Form", https://ClinicalTrials.gov/ProvidedDocs/68/NCT04640168/ICF_000.pdf	https://ClinicalTrials.gov/show/NCT04640168
17	NCT04390464	mulTi-Arm Therapeutic Study in Pre-ICu Patients Admitted With Covid-19 - Repurposed Drugs (TACTIC-R)	TACTIC-R	Recruiting	No Results Available	COVID19	Drug: Ravulizumab|Drug: Baricitinib|Other: Standard of care	Time to incidence of the composite endpoint of: Death, Mechanical ventilation, ECMO, Cardiovascular organ support, or Renal failure|Change in clinical status as assessed on 7-point ordinal scale compared to baseline|Proportion of patients with adverse events of special interest in each treatment arm|Time to Sp02 >94% on room air|Time to first negative SARS-CoV2 PCR|Duration of oxygen therapy|Dura…	Cambridge University Hospitals NHS Foundation Trust	All	18 Years and older Â (Adult, Older Adult)	Phase 4	1167	Other	Interventional	Allocation: Randomized|Intervention Model: Parallel Assignment|Masking: None (Open Label)|Primary Purpose: Treatment	TACTIC-R	May 8, 2020	May 7, 2021	May 1, 2022	May 15, 2020		May 18, 2020	Cambridge University Hospitals NHS Foundation Trust, Cambridge, Cambridgeshire, United Kingdom		https://ClinicalTrials.gov/show/NCT04390464
18	NCT04321993	Treatment of Moderate to Severe Coronavirus Disease (COVID-19) in Hospitalized Patients		Recruiting	No Results Available	COVID-19	Drug: Baricitinib (janus kinase inhibitor)	Clinical status of subject at day 15 (on a 7 point ordinal scale).|Status on an ordinal scale assessed daily while hospitalized and on days 15 and 29 and 180.|Length of time to clinical improvement|Number of participants with normal pulmonary function and normal O2 saturation on days 11, 15 and 29|Number of participants that developed Acute Respiratory Distress Syndrome (ARDS) after treatment|Len…	Lisa Barrett|Nova Scotia Health Authority|Dalhousie University	All	18 Years and older Â (Adult, Older Adult)	Phase 2	800	Other	Interventional	Allocation: Non-Randomized|Intervention Model: Parallel Assignment|Masking: None (Open Label)|Primary Purpose: Treatment	SAIL-004	April 17, 2020	2022-02-01	2022-03-01	March 26, 2020		July 24, 2020	Nova Scotia Health Authority, Halifax, Nova Scotia, Canada		https://ClinicalTrials.gov/show/NCT04321993
19	NCT04399798	Baricitinib for coRona Virus pnEumonia (COVID-19): a THerapeutic Trial	BREATH	Not yet recruiting	No Results Available	Corona Virus Infection	Drug: Baricitinib	Response to treatment: absence of moderate to severe oxygenation impairment (Berlin criteria)|Response to treatment: survival|To quantify the rate of each of: moderate or severe oxygenation impairment within 8 days|To quantify the rate of each of: moderate or severe oxygenation impairment within 15 days|Mortality|Peripheral capillary oxygen saturation (SpO2)|Partial pressure of oxygen/fraction in…	IRCCS Policlinico S. Matteo	All	18 Years to 74 Years Â (Adult, Older Adult)	Phase 2	13	Other	Interventional	Allocation: N/A|Intervention Model: Single Group Assignment|Masking: None (Open Label)|Primary Purpose: Treatment	2020-001185-11	May 15, 2020	September 15, 2020	November 15, 2020	May 22, 2020		May 22, 2020			https://ClinicalTrials.gov/show/NCT04399798
20	NCT04891133	EU SolidAct: An Adaptive Pandemic and Emerging Infection Platform Trial		Recruiting	No Results Available	COVID-19|Emerging Infectious Disease	Drug: Baricitinib|Drug: Placebo	Occurrence of death within 60 days (primary end point, EU SolidAct part B)|Occurrence of disease progression within 14 days (primary end point, EU SolidAct part A)|SpO2/FiO2-ratio at day 5 (primary end point, phase 2 trials)|Occurrence of disease progression within 28 days (shared secondary end point for part A and B)|Time to sustained recovery (shared secondary end point for part A and B)|Time t…	Oslo University Hospital|Institut National de la SantÃ© Et de la Recherche MÃ©dicale, France|Epidemiological and Clinical Research Information Network	All	18 Years and older Â (Adult, Older Adult)	Phase 2|Phase 3	1900	Other	Interventional	Allocation: Randomized|Intervention Model: Parallel Assignment|Masking: Quadruple (Participant, Care Provider, Investigator, Outcomes Assessor)|Primary Purpose: Treatment	EU SolidAct|2021-000541-41	June 3, 2021	2022-12-01	2025-12-01	May 18, 2021		January 4, 2022	Medical University of Innsbruck (University Hospital for Neurosurgery), Innsbruck, Austria|Medical Unversity of Innsbruck (Joint Institute for Emergency Medicine and Critical Care), Innsbruck, Austria|Medical Unversity of Innsbruck (University Hospital for Anaesthesia and Intensive Care), Innsbruck, Austria|Erasme Hospital, Brussels, Belgium|UZ Brussel, Brussels, Belgium|Cliniques Universitaires …		https://ClinicalTrials.gov/show/NCT04891133
21	NCT04890626	Clinical Trial to Evaluate the Efficacy of Different Treatments in Patients With COVID-19		Recruiting	No Results Available	SARS-CoV-2 Infection	Drug: Emtricitabine/Tenofovir Disoproxil Fumarate 200 MG-245 MG Oral Tablet [TRUVADA]|Drug: Baricitinib + dexamethasone|Drug: Dexamethasone	Mortality	Instituto de InvestigaciÃ³n Hospital Universitario La Paz	All	18 Years and older Â (Adult, Older Adult)	Phase 3	2193	Other	Interventional	Allocation: Randomized|Intervention Model: Parallel Assignment|Masking: None (Open Label)|Primary Purpose: Treatment	PanCOVID	April 4, 2020	November 30, 2021	November 30, 2022	May 18, 2021		May 20, 2021	Hospital Universitario La Paz, Madrid, Spain		https://ClinicalTrials.gov/show/NCT04890626
22	NCT04381936	Randomised Evaluation of COVID-19 Therapy	RECOVERY	Recruiting	No Results Available	Severe Acute Respiratory Syndrome	Drug: Lopinavir-Ritonavir|Drug: Corticosteroid|Drug: Hydroxychloroquine|Drug: Azithromycin|Biological: Convalescent plasma|Drug: Tocilizumab|Biological: Immunoglobulin|Drug: Synthetic neutralising antibodies|Drug: Aspirin|Drug: Colchicine|Drug: Baricitinib|Drug: Anakinra|Drug: Dimethyl fumarate|Drug: High Dose Corticosteroid|Drug: Empagliflozin|Drug: Sotrovimab	All-cause mortality|Duration of hospital stay|Composite endpoint of death or need for mechanical ventilation or ECMO	University of Oxford|UK Research and Innovation|National Institute for Health Research, United Kingdom|Wellcome|Bill and Melinda Gates Foundation|Department for International Development, United Kingdom|Health Data Research UK|Medical Research Council Population Health Research Unit|NIHR Clinical Trials Unit Support Funding|NIHR Health Protection Research Unit in Emerging and Zoonotic Infections	All	Child, Adult, Older Adult	Phase 2|Phase 3	50000	Other	Interventional	Allocation: Randomized|Intervention Model: Factorial Assignment|Masking: None (Open Label)|Primary Purpose: Treatment	NDPHRECOVERY|2020-001113-21|ISRCTN50189673	March 19, 2020	2022-11-01	2032-11-01	May 11, 2020		January 20, 2022	Kumasi Center for Collaborative Research in Tropical Medicine KNUST, Kumasi, Ghana|Indian Council of Medical Research, Division of Epidemiology and Communicable Diseases, New Delhi, India|Eijkman Oxford Clinical Research Unit (EOCRU), Eijkman Institute for Molecular Biology, Jakarta, Indonesia|Clinical Trial Unit, Oxford University Clinical Research Unit-Nepal, Patan Academy of Health Sciences, K…		https://ClinicalTrials.gov/show/NCT04381936
23	NCT05187793	Randomized Study of Efficacy of Different Treatment Regimens of Olokizumab	RESET	Recruiting	No Results Available	COVID-19	Drug: Olokizumab|Drug: Standard therapy	Clinical recovery rate at day 7|Rate of clinical deterioration by at least 1 point from the baseline ordinal score at day 28, depending on study group|CRP normalization rate|Ferritin normalization rate|D-dimer normalization rate|Mean CRP levels|Mean ferritin levels|Mean D-dimer levels|Rate of prescribing other anti-inflammatory therapy regimens (rescue therapy), depending on study group	R-Pharm|Federal Budget Institution of Science "Central Research Institute of Epidemiology" of the Rospotrebnadzor|Group of companies Medsi, JSÐ¡	All	18 Years and older Â (Adult, Older Adult)	Phase 3	204	Industry|Other	Interventional	Allocation: Randomized|Intervention Model: Parallel Assignment|Masking: None (Open Label)|Primary Purpose: Treatment	CL04041094	July 8, 2021	2022-04-01	2022-05-01	January 12, 2022		January 12, 2022	State Budgetary Healthcare Institution "City Clinical Hospital named after F.I. Inozemtsev of Moscow Healthcare Department", Moscow, Russian Federation|Federal State Budgetary Institution "Central Clinical Hospital with a Polyclinic" of Presidential Administration of the Russian Federation, Moscow, Russian Federation|State Budgetary Healthcare Institution "City Clinical Hospital â„– 52 of Moscow …		https://ClinicalTrials.gov/show/NCT05187793
24	NCT04366206	Factors Associated With Clinical Outcomes in Patients Hospitalized for Covid-19 in GHT-93 Est		Recruiting	No Results Available	COVID|SARS-CoV 2		Composite of death and mechanical ventilation|Need for mechanical ventilation|Death|Acute kidney injury|Acute respiratory distress syndrome|Cardiac arrhythmia and conduction disorder|60-days mortality|60-days mechanical ventilation	Centre Hospitalier Intercommunal Robert Ballanger|Groupe Hospitalier Pitie-Salpetriere	All	Child, Adult, Older Adult		143	Other	Observational	Observational Model: Cohort|Time Perspective: Prospective	GHTRB-2020-01	March 14, 2020	July 31, 2020	July 31, 2020	April 28, 2020		April 28, 2020	Centre Hospitalier Intercommunal Robert Ballanger, Aulnay-sous-Bois, France|Groupe Hospitalier Pitie Salpetriere, Paris, France		https://ClinicalTrials.gov/show/NCT04366206
25	NCT04365764	Effect of Treatments in Patients Hospitalized for Severe COVID-19 Pneumonia: a Multicenter Cohort Study		Recruiting	No Results Available	Covid-19|ARDS|Pneumonia		Composite of death and mechanical ventilation|Death|Mechanical ventilation|World Health Organization score	Groupe Hospitalier Pitie-Salpetriere|Centre Hospitalier Intercommunal Robert Ballanger|Centre Hospitalier Intercommunal Montfermeil-Le Raincy|CMC Ambroise ParÃ©	All	Child, Adult, Older Adult		400	Other	Observational	Observational Model: Case-Control|Time Perspective: Cross-Sectional	CIC1421-20-06	March 14, 2020	December 31, 2022	December 31, 2022	April 28, 2020		April 1, 2021	Centre Hospitalier Intercommunal Robert Ballanger, Aulnay-sous-Bois, France|Centre Hospitalier Intercommunal Le Raincy-Montfermeil, Montfermeil, France		https://ClinicalTrials.gov/show/NCT04365764

## Sheet: CIGB-325
PHASE 2 CLINICAL TRIAL	WEBSITE	CODE	TITLE
CIGB-325 (CIGB-300)	https://covid-19.cochrane.org/studies/crs-13844822	IG/CIGB300I/CV/2001	Treatment with an Anti-CK2 Synthetic Peptide Improves Clinical Response in Covid-19 Patients with Pneumonia. A Randomized and Controlled Clinical Trial (preprint)

## Sheet: Imatinib
Rank	NCT Number	Title	Acronym	Status	Study Results	Conditions	Interventions	Outcome Measures	Sponsor/Collaborators	Gender	Age	Phases	Enrollment	Funded Bys	Study Type	Study Designs	Other IDs	Start Date	Primary Completion Date	Completion Date	First Posted	Results First Posted	Last Update Posted	Locations	Study Documents	URL
1	NCT04394416	Trial of Imatinib for Hospitalized Adults With COVID-19		Recruiting	No Results Available	COVID-19	Drug: Imatinib|Drug: Placebo oral tablet	The proportion of patients with a two-point change using the 8-category ordinal scale|All-Cause mortality|Time to a 2-point clinical change|Hospitalization|Duration of ECMO or invasive mechanical ventilation|Duration of ICU stay|SARS-CoV-2 negative|Negative oropharyngeal or nasopharyngeal swab|Serious adverse events (SAEs)|Discontinuation due to adverse events	University of Maryland, Baltimore	All	18 Years and older Â (Adult, Older Adult)	Phase 3	204	Other	Interventional	Allocation: Randomized|Intervention Model: Parallel Assignment|Masking: None (Open Label)|Primary Purpose: Treatment	2038GCCC	June 2, 2020	June 1, 2022	June 1, 2023	May 19, 2020		August 12, 2021	University of Maryland Medical Center, Baltimore, Maryland, United States		https://ClinicalTrials.gov/show/NCT04394416
2	NCT04422678	The Safety & Efficacy of Imatinib for the Treatment of SARS-COV-2 Induced Pneumonia		Not yet recruiting	No Results Available	COVID-19	Drug: Imatinib Mesylate|Drug: Standard of Care	Primary endpoint: Disease Progression|Improvement in Hypoxic Index|Hospital Length of Stay|Days on invasive mechanical ventilation|Inflammatory Markers|Viral clearance|Radiological assessment|Safety of Imatinib	Alexandria University|Science, Technology & Innovation Funding Authority (STIFA), Egypt	All	18 Years and older Â (Adult, Older Adult)	Phase 3	30	Other	Interventional	Allocation: Randomized|Intervention Model: Parallel Assignment|Masking: None (Open Label)|Primary Purpose: Treatment	Alex CCM 2020/5	2020-06-01	2020-09-01	2020-10-01	June 9, 2020		June 9, 2020			https://ClinicalTrials.gov/show/NCT04422678
3	NCT04346147	Clinical Trial to Evaluate Efficacy of 3 Types of Treatment in Patients With Pneumonia by COVID-19	Covid19COVINIB	Active, not recruiting	No Results Available	COVID-19 Pneumonia	Drug: Imatinib tablets|Drug: Baricitinib Oral Tablet|Other: Supportive tratment	time to clinical improvement|Safety of treatments|Tolerability of treatments	Hospital Universitario de Fuenlabrada|Centro Nacional de Investigaciones Oncologicas CARLOS III	All	18 Years and older Â (Adult, Older Adult)	Phase 2	168	Other	Interventional	Allocation: Randomized|Intervention Model: Parallel Assignment|Masking: None (Open Label)|Primary Purpose: Treatment	24032020	May 7, 2020	June 2, 2021	2021-09-01	April 15, 2020		August 3, 2021	Hospital Universitario de Fuenlabrada, Fuenlabrada, Madrid, Spain		https://ClinicalTrials.gov/show/NCT04346147
4	NCT05220280	SOLIDARITY Finland Plus Long COVID-19		Not yet recruiting	No Results Available	Covid19|Coronavirus Disease 2019|SARS-CoV-2 Acute Respiratory Disease	Drug: Imatinib|Drug: Infliximab	Long-COVID symptoms|Health-related quality of life|Mortality|Incidence of comorbidity|Lung function|Whole-genome sequencing	Clinical Urology and Epidemiology Working Group|University of Helsinki|World Health Organization|Helsinki University Central Hospital|HyvinkÃ¤Ã¤ Hospital|Kanta-HÃ¤me Central Hospital|Kuopio University Hospital|City of Helsinki|Oulu University Hospital|Porvoo Hospital|Seinajoki Central Hospital|Mikkeli Central Hospital|Tampere University Hospital	All	18 Years and older Â (Adult, Older Adult)	Phase 4	400	Other	Interventional	Allocation: Randomized|Intervention Model: Parallel Assignment|Masking: None (Open Label)|Primary Purpose: Treatment	SOLP21	February 6, 2022	2024-12-01	2025-12-01	February 2, 2022		February 2, 2022			https://ClinicalTrials.gov/show/NCT05220280
5	NCT04953052	A Randomized Study to Investigate the Effect of Intravenous Imatinib on the Amount of Oxygen in the Lungs and Blood of Adults With COVID-19 Needing Mechanical Ventilation and Supportive Care.	IMPRESS COVID	Recruiting	No Results Available	Acute Respiratory Distress Syndrome|COVID-19 Acute Respiratory Distress Syndrome|Covid19|ARDS|Pulmonary Oedema	Drug: Imatinib Mesylate|Drug: Placebo	Change from baseline in Oxygen Saturation Index (OSI) at Day 10|Change from Baseline in Oxygen Saturation Index (OSI) at Day 3 and Day 5|Mortality rate at Day 29 and Day 60|Change from baseline in WHO 9-point ordinal scale for clinical improvement to Day 10 and Day 29|Duration of mechanical ventilation (Days) to Day 29 and Day 60|Duration of stay in ICU (Days) to Day 29 and Day 60|Time to first s…	Exvastat Ltd.	All	18 Years and older Â (Adult, Older Adult)	Phase 2	84	Industry	Interventional	Allocation: Randomized|Intervention Model: Parallel Assignment|Masking: Triple (Participant, Care Provider, Investigator)|Primary Purpose: Treatment	EX003|959310	2021-11-01	2022-02-01	2022-04-01	July 7, 2021		November 9, 2021	Sir Sayajirao General Hospital (SSG Hospital), Medical College Baroda, Jail Road Indira Avenue)Anandpura, Vadodara, Gujarat, India|St George's Hospital, P D Mello Road, Fort Road, CST Terminal,, Mumbai, Maharashtra, India|Government Medical College and Hospital, Nagpur, Maharashtra, India|PCMC PGI Yashwantrao Chavan Memorial Hospital, Nagar, Pune, India|NRS Medical College and Hospital, Kolkata, …		https://ClinicalTrials.gov/show/NCT04953052
6	NCT04794088	Intravenous Imatinib in Mechanically Ventilated COVID-19 Patients	INVENT COVID	Recruiting	No Results Available	ARDS|Acute Respiratory Distress Syndrome|Covid19|Endothelial Dysfunction|Pulmonary Edema	Drug: Imatinib Mesylate intravenous solution|Drug: Placebo	Change in extravascular lung water index|Pulmonary vascular permeability|PaO2/FiO2 ratio as measure of gas-exchange|Oxygenation index as measure of gas-exchange|Driving pressure as an indicator of global lung strain|Compliance as a measure of respiratory mechanics|Mechanical power as quantification of the energy load delivered to the lung per positive pressure breath|Pro-inflammatory cytokines|Ma…	Dr. Jurjan Aman|Simbec Orion|Exvastat Ltd.|KABS laboratories|VU University Medical Center	All	18 Years and older Â (Adult, Older Adult)	Phase 2	90	Other|Industry	Interventional	Allocation: Randomized|Intervention Model: Parallel Assignment|Masking: Quadruple (Participant, Care Provider, Investigator, Outcomes Assessor)|Primary Purpose: Treatment	INVENT COVID	March 14, 2021	2021-12-01	2022-02-01	March 11, 2021		March 24, 2021	Amsterdam Universitair Medische Centra, location VUmc, Amsterdam, Noord-Holland, Netherlands|Amsterdam Universitair Medische Centra, location AMC, Amsterdam, Noord-Holland, Netherlands		https://ClinicalTrials.gov/show/NCT04794088
7	NCT04357613	IMATINIB IN COVID-19 DISEASE IN AGED PATIENTS.	IMAGE-19	Not yet recruiting	No Results Available	SARS Virus	Drug: Experimental drug	To evaluate the benefit of early imatinib therapy to prevent severe COVID-19 disease in hospitalized aged patients.|To evaluate the feasibility of imatinib therapy.|To evaluate safety of imatinib therapy|To evaluate the clinical evolution|To evaluate the progression rate to severe COVID-19 disease|To evaluate mortality|To evaluate viral load|To evaluate plasmatic levels of imatinib	Versailles Hospital	All	70 Years and older Â (Older Adult)	Phase 2	99	Other	Interventional	Allocation: Randomized|Intervention Model: Parallel Assignment|Masking: None (Open Label)|Primary Purpose: Treatment	P20/05_IMAGE19	September 1, 2020	December 1, 2020	December 1, 2021	April 22, 2020		August 7, 2020	CHU Bordeaux, Bordeaux, France|CH de Versailles, Le Chesnay, France		https://ClinicalTrials.gov/show/NCT04357613
8	EudraCT2020-001236-10 (The Netherlands)

## Sheet: Ivermectin_covid_completed
Rank	NCT Number	Title	Acronym	Status	Study Results	Conditions	Interventions	Outcome Measures	Sponsor/Collaborators	Gender	Age	Phases	Enrollment	Funded Bys	Study Type	Study Designs	Other IDs	Start Date	Primary Completion Date	Completion Date	First Posted	Results First Posted	Last Update Posted	Locations	Study Documents	URL
1	NCT04381884	Ivermectin Effect on SARS-CoV-2 Replication in Patients With COVID-19		Completed	No Results Available	COVID-19 Drug Treatment	Drug: IVERMECTIN (IVER PÂ®) arm will receive IVM 600 Âµg / kg once daily plus standard care. CONTROL arm will receive standard care.	Reduction in SARS-CoV-2 viral load|Number of patients with partial or complete response in COVID-19 clinical symptoms|Number of patients with worsening in the clinical condition|Number of patients with adverse events as a measure of safety and tolerability|Ivermectin concentrations measured in plasma|Evaluation of reactivity of the antibodies against SARS-CoV-2	Laboratorio Elea Phoenix S.A.|Universidad Nacional de Salta|Centro de InvestigaciÃ³n Veterinaria Tandil CIVETAN|Hospital de PediatrÃ­a Prof Dr. Juan P. Garrahan|Universidad Nacional de Quilmes	All	18 Years to 69 Years Â (Adult, Older Adult)	Phase 2	45	Industry|Other	Interventional	Allocation: Randomized|Intervention Model: Parallel Assignment|Masking: None (Open Label)|Primary Purpose: Treatment	IVM-AR-1	May 18, 2020	September 29, 2020	September 29, 2020	May 11, 2020		October 5, 2020	Hospital de Cuenca Alta, CaÃ±uelas, Buenos Aires, Argentina|Centro de EducaciÃ³n MÃ©dica e Investigaciones ClÃ­nicas "Norberto Quirno" CEMIC, Buenos Aires, Ciudad De Buenos Aires, Argentina|Hospital de Infecciosas Francisco Javier MuÃ±iz, Ciudad Autonoma de Buenos Aires, Argentina		https://ClinicalTrials.gov/show/NCT04381884
2	NCT04646109	Ivermectin for Severe COVID-19 Management		Completed	Has Results	COVID-19	Drug: Ivermectin	Gender Distribution of the Patients|Age Distribution of the Patients|Percentage of Patients With Accompanying Diseases|Percentage of Patients With Baseline Clinical Symptoms|Body Temperature Means of the Patients|Heart Rate Means of the Patients|Respiratory Rate Means of the Patients|Systolic and Diastolic Pressure Means of the Patients|Number of Participants With Clinical Response|Changes in Oxy…	Afyonkarahisar Health Sciences University|NeuTec Pharma	All	18 Years and older Â (Adult, Older Adult)	Phase 3	66	Other|Industry	Interventional	Allocation: Randomized|Intervention Model: Parallel Assignment|Masking: None (Open Label)|Primary Purpose: Treatment	IVMC_03	May 11, 2020	September 2, 2020	September 2, 2020	November 27, 2020	January 27, 2021	January 27, 2021	Afyonkarahisar Health Science University, Afyonkarahisar, Turkey|Gulhane Faculty of Medicine, University of Health Sciences, Ankara, Turkey|YÄ±ldÄ±rÄ±m BeyazÄ±t University, Ankara City Hospital, Ankara, Turkey|Haydarpasa Sultan Abdulhamid Han Training and Research Hospital, Ä°stanbul, Turkey	"Study Protocol", https://ClinicalTrials.gov/ProvidedDocs/09/NCT04646109/Prot_000.pdf|"Informed Consent Form", https://ClinicalTrials.gov/ProvidedDocs/09/NCT04646109/ICF_001.pdf|"Statistical Analysis Plan", https://ClinicalTrials.gov/ProvidedDocs/09/NCT04646109/SAP_002.pdf	https://ClinicalTrials.gov/show/NCT04646109
3	NCT05155527	A Double-blind Randomized Controlled Trial of Ivermectin With Favipiravir in Mild-to-moderate COVID-19 Patients	IFCOV	Not yet recruiting	No Results Available	COVID-19	Drug: Ivermectin Tablets|Other: Placebo	The rate of SARS-CoV-2 viral clearance|Mortality rate|Progression to severe disease|Duration of admission|Oxygen requirement|Proportions of SARS-CoV-2 viral clearance	Mahidol University|Prince of Songkla University	All	18 Years to 65 Years Â (Adult, Older Adult)	Phase 2	200	Other	Interventional	Allocation: Randomized|Intervention Model: Parallel Assignment|Masking: Quadruple (Participant, Care Provider, Investigator, Outcomes Assessor)|Primary Purpose: Treatment	CREC067/64BR-MED46	2021-12-01	2022-06-01	2022-06-01	December 13, 2021		December 13, 2021			https://ClinicalTrials.gov/show/NCT05155527
4	NCT04681053	Inhaled Ivermectin and COVID-19	CCOVID-19	Recruiting	No Results Available	COVID-19	Drug: Ivermectin Powder	Rate of virological cure by Rt -PCR for COVID -19 using ivermectin when compared to standard treatment|resolution of pneumonia	Mansoura University	All	18 Years to 80 Years Â (Adult, Older Adult)	Phase 3	80	Other	Interventional	Allocation: Non-Randomized|Intervention Model: Parallel Assignment|Masking: None (Open Label)|Primary Purpose: Treatment	R.20.11.1090.R1	February 25, 2021	April 30, 2021	December 31, 2021	December 23, 2020		February 24, 2021	Mansoura Faculty of Medicine, Mansoura, Dakahlyia, Egypt		https://ClinicalTrials.gov/show/NCT04681053
5	NCT04920942	Ivermectin Treatment Efficacy in Covid-19 High Risk Patients	I-TECH	Completed	No Results Available	COVID-19	Drug: Ivermectin 0.4mg/kg/day for 5 days	Number of Patients who Progressed to Severe Disease (Clinical stage 4 or 5)|Time Required for Patients on Treatment Arm to Progressed to Severe Disease (Clinical stage 4 or 5)|Mortality|Number of Participants with Complete Resolution of Symptoms by day 5 of Enrolment|Chest Radiograph Changes Pertaining to COVID-19 by Day 5 of Enrolment|Changes in Serum Absolute Lymphocyte Count|Changes in Serum A…	Clinical Research Centre, Malaysia	All	50 Years to 100 Years Â (Adult, Older Adult)	Phase 3	500	Other	Interventional	Allocation: Randomized|Intervention Model: Parallel Assignment|Masking: Single (Investigator)|Primary Purpose: Treatment	I-TECH21	May 31, 2021	October 31, 2021	October 31, 2021	June 10, 2021		December 8, 2021	Sultanah Aminah Hospital, Johor Bahru, Johor, Malaysia|Sultanah Bahiyah Hospital, Alor Setar, Kadah, Malaysia|Sultan Abdul Halim Hospital, Sungai Petani, Kedah, Malaysia|Hospital Raja Permaisuri Bainun, Ipoh, Ipoh, Perak, Malaysia|Taiping Hospital, Taiping, Perak, Malaysia|Tuanku Fauziah Hospital, Kangar, Perlis, Malaysia|Pulau Pinang Hospital, George Town, Pulau Pinang, Malaysia|Lahad Datu Hospi…		https://ClinicalTrials.gov/show/NCT04920942
6	NCT04360356	Ivermectin and Nitazoxanide Combination Therapy for COVID-19		Not yet recruiting	No Results Available	COVID-19	Combination Product: Ivermectin plus Nitazoxanide|Other: Standard Care	Number of Patients with COVID-19-negative PCR|Number of patients with improved respiratory rate|Number of patients with improved PaO2|Number of patients with normalized Serum IL6|Number of patients with normalized Serum TNFÎ±|Number of patients with normalized Serum iron|Number of patients with normalized Serum ferritin|Number of patients with normalized International normalized ratio "INR" for p…	Tanta University	All	18 Years to 65 Years Â (Adult, Older Adult)	Phase 2|Phase 3	100	Other	Interventional	Allocation: Randomized|Intervention Model: Parallel Assignment|Masking: Double (Participant, Investigator)|Primary Purpose: Treatment	IVR/NTZ	2020-05-01	2020-10-01	2020-12-01	April 24, 2020		April 24, 2020			https://ClinicalTrials.gov/show/NCT04360356
7	NCT04429711	Ivermectin vs. Placebo for the Treatment of Patients With Mild to Moderate COVID-19		Recruiting	No Results Available	COVID-19	Drug: Ivermectin Oral Product	Viral clearance at day 6|Viral shedding duration|Symptoms clearance time	Sheba Medical Center	All	18 Years to 80 Years Â (Adult, Older Adult)	Not Applicable	100	Other	Interventional	Allocation: Randomized|Intervention Model: Parallel Assignment|Masking: Quadruple (Participant, Care Provider, Investigator, Outcomes Assessor)|Primary Purpose: Treatment	SHEBA-20-7156-ES-CTIL	May 12, 2020	September 30, 2020	October 31, 2020	June 12, 2020		June 16, 2020	Sheba Medical Center, Ramat-Gan, Israel		https://ClinicalTrials.gov/show/NCT04429711
8	NCT05060666	Prophylaxis of COVID-19 Disease With Ivermectin in COVID-19 Contact Persons [German: Prophylaxe Der COVID-19-Erkrankung Mit Ivermectin Bei COVID-19 Kontaktpersonen]		Not yet recruiting	No Results Available	Covid19	Drug: Ivermectin|Drug: Placebo	COVID-19 disease|Adverse events and side effects|Type, number and severity of symptoms|Severity of the COVID-19 disease	Infectopharm Arzneimittel GmbH|GKM Gesellschaft fÃ¼r Therapieforschung mbH	All	18 Years and older Â (Adult, Older Adult)	Phase 3	412	Industry|Other	Interventional	Allocation: Randomized|Intervention Model: Parallel Assignment|Masking: Double (Participant, Investigator)|Primary Purpose: Prevention	PREVENT-COVID|2021-002445-15	2021-11-01	2022-03-01	2022-03-01	September 29, 2021		November 2, 2021			https://ClinicalTrials.gov/show/NCT05060666
9	NCT04591600	Effectiveness of Ivermectin and Doxycycline on COVID-19 Patients		Completed	No Results Available	Covid19	Drug: Ivermectin and Doxycyline|Drug: Standard of care	Mortality rate|Rate of progression disease|Time to recovery	Alkarkh Health Directorate-Baghdad	All	16 Years to 86 Years Â (Child, Adult, Older Adult)	Phase 1|Phase 2	140	Other	Interventional	Allocation: Randomized|Intervention Model: Parallel Assignment|Masking: Single (Outcomes Assessor)|Primary Purpose: Treatment	IVM-DOX	July 1, 2020	September 30, 2020	October 14, 2020	October 19, 2020		October 19, 2020	Akarkh Healt hdirectorate, Baghdad, Iraq		https://ClinicalTrials.gov/show/NCT04591600
10	NCT04510233	Ivermectin Nasal Spray for COVID19 Patients		Not yet recruiting	No Results Available	Covid19	Drug: Ivermectin nasal|Drug: Ivermectin oral|Other: standard care	PCR of SARS-Cov2 RNA	Tanta University	All	18 Years to 60 Years Â (Adult)	Phase 2	60	Other	Interventional	Allocation: Randomized|Intervention Model: Parallel Assignment|Masking: None (Open Label)|Primary Purpose: Treatment	IvrInh	2020-09-01	2020-10-01	2020-12-01	August 12, 2020		August 12, 2020			https://ClinicalTrials.gov/show/NCT04510233
11	NCT04530474	Outpatient Use of Ivermectin in COVID-19		Withdrawn	No Results Available	Covid19	Drug: Ivermectin Pill|Drug: Placebo	Clinical Improvement	Temple University	All	18 Years and older Â (Adult, Older Adult)	Phase 3	0	Other	Interventional	Allocation: Randomized|Intervention Model: Parallel Assignment|Masking: Triple (Participant, Care Provider, Outcomes Assessor)|Primary Purpose: Treatment	1285242	April 1, 2021	June 30, 2021	June 30, 2021	August 28, 2020		May 26, 2021	Temple University Hospital, Philadelphia, Pennsylvania, United States		https://ClinicalTrials.gov/show/NCT04530474
12	NCT04343092	Effectiveness of Ivermectin as add-on Therapy in COVID-19 Management		Completed	Has Results	COVID 19	Drug: Ivermectin (IVM)	Number of Cured Patients|Time to Cure of COVID-19 Patients in the IVM +HCQ+AZT Group	University of Baghdad	All	18 Years and older Â (Adult, Older Adult)	Phase 1	16	Other	Interventional	Allocation: N/A|Intervention Model: Single Group Assignment|Masking: None (Open Label)|Primary Purpose: Treatment	PRO20040001	April 18, 2020	May 31, 2020	June 1, 2020	April 13, 2020	November 4, 2020	November 4, 2020	General Directorate of Medical City, Bagdad, Baghdad, Iraq	"Study Protocol and Statistical Analysis Plan", https://ClinicalTrials.gov/ProvidedDocs/92/NCT04343092/Prot_SAP_000.pdf	https://ClinicalTrials.gov/show/NCT04343092
13	NCT04739410	Effectiveness of Ivermectin in SARS-CoV-2/COVID-19 Patients		Completed	No Results Available	Covid19	Drug: Ivermectin	Resolution of symptoms|Progression of the disease	FMH College of Medicine and Dentistry	All	18 Years to 75 Years Â (Adult, Older Adult)	Phase 4	50	Other	Interventional	Allocation: Randomized|Intervention Model: Parallel Assignment|Masking: None (Open Label)|Primary Purpose: Treatment	IRB#FMH-07-2020-IRB-766-M	May 1, 2020	June 30, 2020	June 30, 2020	February 4, 2021		February 4, 2021	Aijaz Zeeshan Khan Chachar, Lahore, Punjab, Pakistan		https://ClinicalTrials.gov/show/NCT04739410
14	NCT04937569	Ivermectin Versus Standard Treatment in Mild COVID-19		Not yet recruiting	No Results Available	Covid19	Drug: Ivermectin Tablets	Rate of ICU admission in mild COVID-19 cases|Time to clinical improvement.|Overall clinical state, using the 7-point ordinal scale|The duration of critical care interventions in each arm of the study.|â€¢ Proportion of subjects who develop adverse events associated with the study drug.	Assiut University	All	18 Years to 80 Years Â (Adult, Older Adult)	Phase 3	1644	Other	Interventional	Allocation: Randomized|Intervention Model: Sequential Assignment|Masking: None (Open Label)|Primary Purpose: Treatment	AssiutU-Ivercom	July 1, 2021	September 1, 2021	November 1, 2021	June 24, 2021		June 29, 2021	Aliae AR Mohamed-Hussein, Assiut, Egypt		https://ClinicalTrials.gov/show/NCT04937569
15	NCT04712279	The (HD)IVACOV Trial (The High-Dose IVermectin Against COVID-19 Trial)		Not yet recruiting	No Results Available	Covid19	Drug: Ivermectin 0.6mg/kg/day|Drug: Ivermectin 1.0mg/kg/day|Drug: Placebo|Drug: Hydroxychloroquine	World Health Organization (WHO) Clinical Progression Scale [0 to 10; 0 = uninfected; 10 = death]|World Health Organization (WHO) COVID=19 Ordinal Scale for Clinical Improvement [1 to 8; 1 = not hospitalized, no limitation on activities; 8 = death] [Time Frame: Day 7]|Time-to-recovery|Viral load|Positivity rate of rtPCR-SARS-CoV-2 (qualitative analysis)|Duration of fatigue|Duration of anosmia|Over…	Corpometria Institute	All	18 Years and older Â (Adult, Older Adult)	Phase 2|Phase 3	294	Other	Interventional	Allocation: Randomized|Intervention Model: Parallel Assignment|Masking: Triple (Participant, Care Provider, Investigator)|Primary Purpose: Treatment	CORPO-DRUG-SARSCoV2-001	January 25, 2021	March 21, 2021	April 20, 2021	January 15, 2021		January 15, 2021			https://ClinicalTrials.gov/show/NCT04712279
16	NCT04405843	Efficacy of Ivermectin in Adult Patients With Early Stages of COVID-19 (EPIC Trial)	EPIC	Completed	No Results Available	COVID-19	Drug: Ivermectin Oral Product|Drug: Placebo	Time to event|Clinical condition on day 2|Clinical condition on day 5|Clinical condition on day 8|Clinical condition on day 11|Clinical condition on day 15|Clinical condition on day 21|Proportion of subjects with additional care|Proportion of subjects who die|Duration of additional care|Adverse events|Proportion of subjects who discontinue intervention|Duration of fever	Centro de Estudios en InfectogÃ­a Pediatrica	All	18 Years and older Â (Adult, Older Adult)	Phase 2|Phase 3	476	Other	Interventional	Allocation: Randomized|Intervention Model: Parallel Assignment|Masking: Quadruple (Participant, Care Provider, Investigator, Outcomes Assessor)|Primary Purpose: Treatment	ScDi823|IVE-PA	July 14, 2020	December 21, 2020	December 21, 2020	May 28, 2020		December 28, 2020	Centro de Estudios en InfectologÃ­a PediÃ¡trica, Cali, Valle, Colombia		https://ClinicalTrials.gov/show/NCT04405843
17	NCT04894721	Prophylaxis for COVID-19: Ivermectin in Close Contacts of COVID-19 Cases (IVERNEX-TUC)	IVERNEX-TUC	Completed	No Results Available	Covid19	Drug: Ivermectin|Other: Placebo	Number of subjects who were diagnosed with COVID-19 in EG and CG (Negative polymerase chain reaction - real-time).|Contagion risk.|Prophylactic effect associated with patient's preexisting comorbidity	Ministry of Public Health, Argentina	All	18 Years to 60 Years Â (Adult)	Phase 2|Phase 3	172	Other	Interventional	Allocation: Randomized|Intervention Model: Parallel Assignment|Masking: Triple (Participant, Care Provider, Investigator)|Primary Purpose: Prevention	5077/410 CH 2020	June 1, 2021	September 30, 2021	October 1, 2021	May 20, 2021		December 7, 2021	SI.PRO.SA, Ministerio de Salud PÃºblica, TucumÃ¡n, Argentina	"Study Protocol", https://ClinicalTrials.gov/ProvidedDocs/21/NCT04894721/Prot_002.pdf|"Informed Consent Form", https://ClinicalTrials.gov/ProvidedDocs/21/NCT04894721/ICF_003.pdf	https://ClinicalTrials.gov/show/NCT04894721
18	NCT04529525	Ivermectin to Prevent Hospitalizations in COVID-19	IVERCORCOVID19	Completed	No Results Available	Covid19	Drug: Ivermectin|Drug: Placebo	Percentage of Hospitalization of medical cause in patients with COVID-19 in each arm|Time to hospitalization|Percentage of Use of invasive mechanical ventilation support in each arm|Time to invasive mechanical ventilation support|Percentage of dialysis in each arm|All-cause mortality|Negative of the swab at 3Â±1 days and 12Â±2 days after entering the study|Incidence of Treatment-Emergent Adverse …	Instituto de CardiologÃ­a de Corrientes	All	18 Years and older Â (Adult, Older Adult)	Phase 2|Phase 3	501	Other	Interventional	Allocation: Randomized|Intervention Model: Parallel Assignment|Masking: Quadruple (Participant, Care Provider, Investigator, Outcomes Assessor)|Primary Purpose: Treatment	IVERCORCOVID19MSPICC	August 19, 2020	February 22, 2021	February 22, 2021	August 27, 2020		July 7, 2021	Ministry of Public Health of the Province of Corrientes, Corrientes, Argentina		https://ClinicalTrials.gov/show/NCT04529525
19	NCT04391127	Hydroxychloroquine and Ivermectin for the Treatment of COVID-19 Infection		Completed	No Results Available	COVID-19	Drug: Hydroxychloroquine|Drug: Ivermectin|Drug: Placebo	Mean days of hospital stay|Rate of Respiratory deterioration, requirement of invasive mechanical ventilation or dead|Mean of oxygenation index delta|Mean time to viral PCR negativization	Centenario Hospital Miguel Hidalgo	All	16 Years to 90 Years Â (Child, Adult, Older Adult)	Phase 3	108	Other	Interventional	Allocation: Randomized|Intervention Model: Parallel Assignment|Masking: Double (Participant, Care Provider)|Primary Purpose: Treatment	2020-A-09	May 4, 2020	November 6, 2020	November 6, 2020	May 18, 2020		November 9, 2020	Jose Manuel Arreola Guerra, Aguascalientes, Mexico		https://ClinicalTrials.gov/show/NCT04391127
20	NCT04523831	Clinical Trial of Ivermectin Plus Doxycycline for the Treatment of Confirmed Covid-19 Infection		Completed	Has Results	Covid19	Drug: Ivermectin and Doxycycline|Drug: Standard of care	Number of Patients With Early Clinical Improvement|Number of Participants With Late Clinical Recovery|Number of Patients Having Clinical Deterioration.|Number of Patients Remain Persistently Positive for RT-PCR of Covid-19	Dhaka Medical College	All	18 Years and older Â (Adult, Older Adult)	Phase 3	400	Other	Interventional	Allocation: Randomized|Intervention Model: Parallel Assignment|Masking: Double (Participant, Investigator)|Primary Purpose: Treatment	ERC-DMC/ECC/2020/117	June 1, 2020	August 22, 2020	September 10, 2020	August 24, 2020	October 9, 2020	October 9, 2020	Dhaka Medical College, Dhaka, Bangladesh	"Study Protocol and Informed Consent Form", https://ClinicalTrials.gov/ProvidedDocs/31/NCT04523831/Prot_ICF_000.pdf|"Statistical Analysis Plan", https://ClinicalTrials.gov/ProvidedDocs/31/NCT04523831/SAP_001.pdf	https://ClinicalTrials.gov/show/NCT04523831
21	NCT04723459	Efficacy of Nano-Ivermectin Impregnated Masks in Prevention of Covid-19 Among Healthy Contacts and Medical Staff		Recruiting	No Results Available	Covid-19	Other: ivermectin impregnated mask	Number of persons in each group who Complain of any suspected Symptoms|Number of persons in each group who are diagnosed as COVID-19 patients	South Valley University	All	18 Years and older Â (Adult, Older Adult)	Not Applicable	150	Other	Interventional	Allocation: Randomized|Intervention Model: Parallel Assignment|Masking: None (Open Label)|Primary Purpose: Prevention	SVU MED CIT0 23 4 21 1 121	January 23, 2021	February 19, 2021	March 28, 2021	January 25, 2021		March 17, 2021	Zaky Aref, Qina, Egypt		https://ClinicalTrials.gov/show/NCT04723459
22	NCT04729140	An Outpatient Clinical Trial Using Ivermectin and Doxycycline in COVID-19 Positive Patients at High Risk to Prevent COVID-19 Related Hospitalization		Recruiting	No Results Available	Covid19	Drug: Ivermectin Tablets|Drug: Doxycycline Tablets|Drug: Placebo	Decreased admission rate to the hospital secondary to respiratory illness related to COVID-19|Decrease in total duration of symptoms secondary to respiratory illness related to COVID-19|Assessment of White Blood Cell Count|Assessment of Hemoglobin level|Assessment of Hematocrit level|Assessment of Platelet Count|Assessment of Sodium level|Assessment of Potassium level|Assessment of Chloride level…	Max Health, Subsero Health	All	18 Years and older Â (Adult, Older Adult)	Phase 4	150	Other	Interventional	Allocation: Randomized|Intervention Model: Parallel Assignment|Masking: Triple (Participant, Care Provider, Investigator)|Primary Purpose: Treatment	COVIVER-OUT PLUS	December 28, 2020	December 28, 2021	March 28, 2022	January 28, 2021		April 1, 2021	MAX HEALTH, Subsero Health 2055 Wood Street, Suite 100, Sarasota, Florida, United States		https://ClinicalTrials.gov/show/NCT04729140
23	NCT04668469	Efficacy and Safety of Ivermectin for Treatment and Prophylaxis of COVID-19 Pandemic		Completed	No Results Available	Covid19	Drug: Ivermectin|Drug: Hydroxychloroquine|Behavioral: personal protective Measures	number of participants with improvement of clinical condition (symptoms and signs)|Reduction of recovery time, hospital stay days and mortality rate|improvement of laboratory investigations and 2 consecutive negative PCR tests taken at least 48 hours apart.	Benha University	All	18 Years to 80 Years Â (Adult, Older Adult)	Not Applicable	600	Other	Interventional	Allocation: Randomized|Intervention Model: Parallel Assignment|Masking: Triple (Participant, Care Provider, Investigator)|Primary Purpose: Treatment	Re96.2020	June 8, 2020	September 15, 2020	October 30, 2020	December 16, 2020		December 16, 2020	Benha Faculty of Medicine, Benha University, BanhÄ, Qaluopia, Egypt		https://ClinicalTrials.gov/show/NCT04668469
24	NCT04425850	USEFULNESS of Topic Ivermectin and Carrageenan to Prevent Contagion of Covid 19	IVERCAR	Completed	Has Results	Covid19	Combination Product: Iota carrageenan nasal spray and Ivermectin oral drops (used as buccal drops)	Number of Infected Subjects|Adverse Events Other Than Those Resulting From Contagion or Disease Progression	Eurnekian Public Hospital	All	18 Years and older Â (Adult, Older Adult)		229	Other	Observational	Observational Model: Cohort|Time Perspective: Prospective	IVERCAR	June 1, 2020	August 10, 2020	August 10, 2020	June 11, 2020	October 19, 2020	October 19, 2020	Hospital Eurnekian, Buenos Aires, Argentina	"Study Protocol and Statistical Analysis Plan", https://ClinicalTrials.gov/ProvidedDocs/50/NCT04425850/Prot_SAP_000.pdf	https://ClinicalTrials.gov/show/NCT04425850
25	NCT04407130	Efficacy and Safety of Ivermectin and Doxycycline in Combination or IVE Alone in Patients With COVID-19 Infection.		Completed	No Results Available	COVID-19 Patients	Drug: Ivermectin + Doxycycline + Placebo|Drug: Ivermectin + Placebo|Drug: Placebo	Virological clearance|Remission of fever|Remission of cough|Patients requiring oxygen|Patients failing to maintain SpO2 >93% despite oxygenation|Number of days on oxygen support|Duration of hospitalization|All causes of mortality	International Centre for Diarrhoeal Disease Research, Bangladesh	All	40 Years to 65 Years Â (Adult, Older Adult)	Phase 2	72	Other	Interventional	Allocation: Randomized|Intervention Model: Parallel Assignment|Masking: Double (Participant, Investigator)|Primary Purpose: Treatment	PR-20039	June 16, 2020	October 30, 2020	November 20, 2020	May 29, 2020		February 4, 2021	Icddr,B, Dhaka, Bangladesh		https://ClinicalTrials.gov/show/NCT04407130
26	NCT04438850	COVidIVERmectin: Ivermectin for Treatment of Covid-19	COVER	Terminated	No Results Available	Covid19	Drug: Ivermectin|Other: Placebo	SADR|Viral load|Trend viral load|Clinical resolution|Viral clearance|Virological clearance|hospitalization rate|Severity score	IRCCS Sacro Cuore Don Calabria di Negrar|Istituto Di Ricerche Farmacologiche Mario Negri	All	18 Years and older Â (Adult, Older Adult)	Phase 2	93	Other	Interventional	Allocation: Randomized|Intervention Model: Sequential Assignment|Masking: Quadruple (Participant, Care Provider, Investigator, Outcomes Assessor)|Primary Purpose: Treatment	cover_1	July 31, 2020	June 8, 2021	June 8, 2021	June 19, 2020		June 23, 2021	IRCCS Sacro Cuore Don Calabria hospital, Negrar, Verona, Italy|Policlinico S. Orsola, Bologna, Italy|Ospedale Luigi Sacco, Milan, Italy|Ospedale di Rovereto, Rovereto, Italy|Ospedale Amedeo di Savoia, Turin, Italy		https://ClinicalTrials.gov/show/NCT04438850
27	NCT04425707	Ivermectin In Treatment of COVID 19 Patients		Recruiting	No Results Available	Covid19	Drug: Ivermectin	to evaluate the role of Ivermectin as a line of treatment for COVID 19|To asses the rate of viral clearance in comparison to other treatment protocols.	Ministry of Health and Population, Egypt	All	18 Years and older Â (Adult, Older Adult)	Not Applicable	100	Other	Interventional	Allocation: Randomized|Intervention Model: Parallel Assignment|Masking: None (Open Label)|Primary Purpose: Treatment	14-2020/3	June 9, 2020	July 1, 2020	September 1, 2020	June 11, 2020		June 11, 2020	isolation and referal hospitals for COVID 19 patients, Cairo, Egypt		https://ClinicalTrials.gov/show/NCT04425707
28	NCT04886362	Ivermectina Colombia (IVERCOL)	IVERCOL	Not yet recruiting	No Results Available	COVID-19 Pneumonia	Drug: Ivermectin|Drug: Placebo	Composite Outcome|Hypoxemia (oxygen saturation â‰¤90%) and need for supplemental oxygen in home care program.|Need for hospitalization including general bed, ICU or ICU.|Death from any cause.|Proportion of patients with 4 or more points on the WHO scale (8-point ordinal scale).|Number of days with supplemental oxygen requirement.|Number of days on ICU management.|Number of days on endotracheal in…	Ayudas Diagnosticas Sura S.A.S	All	18 Years and older Â (Adult, Older Adult)	Phase 2|Phase 3	966	Other	Interventional	Allocation: Randomized|Intervention Model: Parallel Assignment|Masking: Quadruple (Participant, Care Provider, Investigator, Outcomes Assessor)|Primary Purpose: Treatment	IVERCOL01	2021-07-01	2021-09-01	2021-12-01	May 14, 2021		May 14, 2021			https://ClinicalTrials.gov/show/NCT04886362
29	NCT04944082	Remdesivir- Ivermectin Combination Therapy in Severe Covid-19		Not yet recruiting	No Results Available	Covid19	Drug: Ivermectin	1- Improvement in level of oxygenation|2- Need for ventilator support|3- Length of hospital stay|4- Development of complication|5- Mortality	Assiut University	All	18 Years and older Â (Adult, Older Adult)	Phase 4	60	Other	Interventional	Allocation: Randomized|Intervention Model: Parallel Assignment|Masking: None (Open Label)|Primary Purpose: Treatment	Remdesivir-Ivermectin	July 1, 2021	December 31, 2021	December 31, 2021	June 29, 2021		June 29, 2021			https://ClinicalTrials.gov/show/NCT04944082
30	NCT04703205	Study in COvid-19 Patients With iveRmectin (CORVETTE-01)		Active, not recruiting	No Results Available	Covid19	Drug: Ivermectin 3 MG|Drug: Placebo	COVID-19 PCR test (SARS-CoV-2 nucleic acid detection) Period until the COVID-19 PCR test (SARS-CoV-2 nucleic acid detection) becomes negative	Kitasato University	All	20 Years and older Â (Adult, Older Adult)	Phase 2	214	Other	Interventional	Allocation: Randomized|Intervention Model: Parallel Assignment|Masking: Double (Participant, Investigator)|Primary Purpose: Treatment	CORVETTE-01	September 16, 2020	October 22, 2021	May 31, 2022	January 11, 2021		January 20, 2022	Kitasato University, Sagamihara, Kanagawa, Japan		https://ClinicalTrials.gov/show/NCT04703205
31	NCT04407507	Efficacy, Safety and Tolerability of Ivermectin in Subjects Infected With SARS-CoV-2 With or Without Symptoms	SILVERBULLET	Completed	Has Results	COVID-19	Drug: Ivermectin|Drug: Placebo	Participants With a Disease Control Status Defined as no Disease Progression to Severe.|SARS-CoV-2 Viral Load, at 5 and 14 Days|Presence and Frequency of Symptoms Associated With the COVID-19 Disease	Investigacion Biomedica para el Desarrollo de Farmacos S.A. de C.V.	All	18 Years and older Â (Adult, Older Adult)	Phase 2	66	Other	Interventional	Allocation: Randomized|Intervention Model: Parallel Assignment|Masking: Single (Care Provider)|Primary Purpose: Treatment	SARS-COV-IverMX-01	July 1, 2020	January 29, 2021	January 29, 2021	May 29, 2020	May 21, 2021	May 21, 2021	Investigacion BiomÃ©dica para el Desarrollo de FÃ¡rmacos S.A. de C.V., Zapopan, Jalisco, Mexico	"Study Protocol", https://ClinicalTrials.gov/ProvidedDocs/07/NCT04407507/Prot_000.pdf|"Statistical Analysis Plan", https://ClinicalTrials.gov/ProvidedDocs/07/NCT04407507/SAP_001.pdf	https://ClinicalTrials.gov/show/NCT04407507
32	NCT04832945	SARS-CoV-2 Pre-exposure Prophylaxis With Ivermectin Retrospective Cohort Study		Completed	No Results Available	Covid19	Drug: Ivermectin 6 Mg Oral Tablet	Number of participants RT-PCR positive for Covid-19|Number of sick participants who condition deteriorated|Number of sick participants who died	Grupo Rescue S.A.S RepÃºblica Dominicana	All	18 Years and older Â (Adult, Older Adult)		713	Other	Observational	Observational Model: Cohort|Time Perspective: Retrospective	8953	June 29, 2020	September 20, 2020	April 10, 2021	April 6, 2021		April 13, 2021	Centro Medico Bournigal, Puerto Plata, Dominican Republic|Centro MÃ©dico Punta Cana, Punta Cana, Dominican Republic		https://ClinicalTrials.gov/show/NCT04832945
33	NCT04834115	Efficacy of Ivermectin in Outpatients With Non-severe COVID-19		Recruiting	No Results Available	Covid19|Coronavirus Infection	Drug: Ivermectin Tablets|Other: Placebo	Proportion of patients with hospitalization criteria|Proportion of patients with COVID-19 signs and symptoms|Proportion of cohabitants who had COVID-19 after the index case|Drug-related adverse events|Levels of IgG for SARS-CoV-2	Universidad Nacional de AsunciÃ³n|Consejo Nacional de Ciencias y Tecnologia, Paraguay|Ministerio de Salud PÃºblica y Bienestar Social, Paraguay|Centro de informaciÃ³n y recursos para el desarrollo, Paraguay|Centro para el Desarrollo de la InvestigaciÃ³n CientÃ­fica, CEDIC, Paraguay|Instituto Desarrollo, Paraguay	All	18 Years and older Â (Adult, Older Adult)	Phase 3	400	Other	Interventional	Allocation: Randomized|Intervention Model: Parallel Assignment|Masking: Triple (Participant, Investigator, Outcomes Assessor)|Primary Purpose: Treatment	PINV20-387	November 17, 2020	April 30, 2021	May 30, 2021	April 6, 2021		April 6, 2021	Facultad de Ciencias MÃ©dicas - Universidad Nacional de AsunciÃ³n, AsunciÃ³n, Paraguay		https://ClinicalTrials.gov/show/NCT04834115
34	NCT04746365	Ivermectin Role in Covid-19 Clinical Trial	IRICT	Completed	No Results Available	Covid19	Drug: ivermectin|Drug: hydroxychloroquine|Drug: Placebo	Reduction in the WHO ordinal scale of clinical status by at least two points|Time to discharge|Mortality	Elaraby Hospital|Shebin El-Kom Teaching Hospital	All	18 Years and older Â (Adult, Older Adult)	Phase 4	300	Other	Interventional	Allocation: Randomized|Intervention Model: Parallel Assignment|Masking: Double (Participant, Care Provider)|Primary Purpose: Treatment	1029076|2101001	December 6, 2020	January 31, 2021	February 6, 2021	February 9, 2021		February 9, 2021	Shebin-Elkom teaching hospital, ShibÄ«n Al Kawm, Menoufia, Egypt		https://ClinicalTrials.gov/show/NCT04746365
35	NCT04527211	Effectiveness and Safety of Ivermectin for the Prevention of Covid-19 Infection in Colombian Health Personnel	IveprofCovid19	Not yet recruiting	No Results Available	Covid19|Healthcare Worker Patient Transmission	Drug: Ivermectin	Clinical development of covid-19 disease during the intervention period|Seroconversion|Hospitalization requirement|Intensive Care Unit Requirement|Safety of the intervention	Javeriana University	All	18 Years and older Â (Adult, Older Adult)	Phase 3	550	Other	Interventional	Allocation: Randomized|Intervention Model: Parallel Assignment|Masking: Quadruple (Participant, Care Provider, Investigator, Outcomes Assessor)|Primary Purpose: Prevention	Epi1JaveCali	September 7, 2020	November 30, 2020	December 16, 2020	August 26, 2020		August 26, 2020	Pontificia Universidad Javeriana, Cali, Valle Del Cauca, Colombia		https://ClinicalTrials.gov/show/NCT04527211
36	NCT04784481	Ivermectin Reproposing for Mild Stage COVID-19 Outpatients	IVER-Leve	Completed	No Results Available	Covid19|SARS (Severe Acute Respiratory Syndrome)	Drug: Ivermectin	Proportion test|Odd Ratio|Odd Ratio and logistic regression test	Ministry of Public Health, Argentina	All	18 Years to 75 Years Â (Adult, Older Adult)	Phase 1|Phase 2	254	Other	Interventional	Allocation: Randomized|Intervention Model: Parallel Assignment|Masking: None (Open Label)|Primary Purpose: Treatment	5077-410-CH2020	September 20, 2020	December 20, 2020	January 18, 2021	March 5, 2021		April 26, 2021	SI.PRO.SA, Ministerio de Salud PÃºblica, TucumÃ¡n, Argentina		https://ClinicalTrials.gov/show/NCT04784481
37	NCT04551755	Safety and Efficacy of Ivermectin and Doxycycline in Treatment of Covid-19		Not yet recruiting	No Results Available	Covid19	Drug: Ivermectin and Doxycycline|Other: Placebo	Time to outcome measure of fever (<100.40F)and cough|Negative RT-PCR test on day 5 of treatment	Bangladesh Medical Research Council (BMRC)	All	18 Years and older Â (Adult, Older Adult)	Phase 2	188	Other	Interventional	Allocation: Randomized|Intervention Model: Parallel Assignment|Masking: Triple (Participant, Care Provider, Investigator)|Primary Purpose: Treatment	31211062020	2020-09-01	2020-11-01	2020-12-01	September 16, 2020		September 16, 2020			https://ClinicalTrials.gov/show/NCT04551755
38	NCT05040724	Evaluation of the Impact of the Administration of Single Dose of Ivermectin in the Early Phase of COVID-19	IVERCoV	Active, not recruiting	No Results Available	To Assess the Reduction in the Viral Load of SARS-CoV-2 in Patients Receiving Ivermectin Compared to Those Receiving Standard Care	Drug: Ivermectin	negativation of the RT-PCR test on nasopharyngeal samples of SARS-CoV-2	Raincy Montfermeil Hospital Group	All	18 Years and older Â (Adult, Older Adult)	Phase 3	200	Other	Interventional	Allocation: Randomized|Intervention Model: Parallel Assignment|Masking: Triple (Participant, Investigator, Outcomes Assessor)|Primary Purpose: Treatment	2020-005423-37	May 28, 2021	2022-05-01	2022-06-01	September 10, 2021		September 10, 2021	GHI Le Raincy Montfermeil, Montfermeil, France		https://ClinicalTrials.gov/show/NCT05040724
39	NCT04602507	Ivermectin in Adults With Severe COVID-19.		Terminated	No Results Available	Covid19|Severe Acute Respiratory Syndrome	Drug: Ivermectin|Other: Placebo	Admission to the intensive care unit.|Hospital length of stay.|Mortality rate.|ICU length of stay.|Length of stay in ventilator time.|Adverse effects of ivermectin.	CES University	All	18 Years to 100 Years Â (Adult, Older Adult)	Phase 2	75	Other	Interventional	Allocation: Randomized|Intervention Model: Parallel Assignment|Masking: Quadruple (Participant, Care Provider, Investigator, Outcomes Assessor)|Primary Purpose: Treatment	ECA-COVID-CES	December 10, 2020	December 9, 2021	December 9, 2021	October 26, 2020		January 4, 2022	Clinica CES, MedellÃ­n, Antioquia, Colombia		https://ClinicalTrials.gov/show/NCT04602507
40	NCT04716569	Evaluation of Ivermectin Mucoadhesive Nanosuspension as Nasal Spray in Management of Early Covid-19		Recruiting	No Results Available	Covid19	Drug: intranasal ivermectin spray	progression of covid 19 clinical picture	South Valley University	All	18 Years and older Â (Adult, Older Adult)	Phase 2|Phase 3	150	Other	Interventional	Allocation: Randomized|Intervention Model: Parallel Assignment|Masking: None (Open Label)|Primary Purpose: Treatment	SVU MED CIT0 23 4 21 1 120	January 20, 2021	February 20, 2021	March 20, 2021	January 20, 2021		March 17, 2021	Zaky Aref, QinÄ, Qina, Egypt		https://ClinicalTrials.gov/show/NCT04716569
41	NCT04768179	Safety & Efficacy of Low Dose Aspirin / Ivermectin Combination Therapy for Treatment of Covid-19 Patients	IVCOM	Not yet recruiting	No Results Available	Covid19	Drug: 3-dayIVM 200 mcg/kg/day/14-day 75mgASA/day + standard of care (intervention 1)	SARS COV 2 Viral clearance|World Health Organization COVID-19 ordinal improvement score|Clinical recovery|Spectrum and severity of adverse events|Maximum Plasma concentration|Minimum Plasma concentration|Area Under the Curve	Makerere University|Ministry of Health, Uganda|Mbarara University of Science and Technology|Joint Clinical Research Center	All	18 Years to 64 Years Â (Adult)	Phase 2|Phase 3	490	Other	Interventional	Allocation: Randomized|Intervention Model: Parallel Assignment|Masking: None (Open Label)|Primary Purpose: Treatment	IVCOM PROTOCOL VERSION 03	February 19, 2021	June 30, 2021	September 30, 2021	February 24, 2021		February 24, 2021			https://ClinicalTrials.gov/show/NCT04768179
42	NCT04959786	MANS-NRIZ Trial for COVID-19 Treatment : Extension Study		Recruiting	No Results Available	COVID-19 Pneumonia	Drug: Ivermectin,ribavirin ,nitazoxanide and zinc	Stabilization of oxygen|In-hospital and 28-day mortality|Negative conversion of SARS-CoV- 2 by Day 28|Time to clinical improvement	Mansoura University	All	18 Years and older Â (Adult, Older Adult)	Phase 2|Phase 3	100	Other	Interventional	Allocation: Randomized|Intervention Model: Parallel Assignment|Masking: Single (Participant)|Primary Purpose: Treatment	mu-med-2020-26	April 1, 2021	2022-11-01	2022-12-01	July 13, 2021		July 13, 2021	Mansoura University Hospital, Mansoura, Select A State Or Province, Egypt		https://ClinicalTrials.gov/show/NCT04959786
43	NCT04392427	New Antiviral Drugs for Treatment of COVID-19		Not yet recruiting	No Results Available	COVID|Drug Effect	Drug: Treatment group: will receive a combination of Nitazoxanide, Ribavirin and Ivermectin for a duration of seven days :	negative test result for COVID-19	Mansoura University	All	12 Years and older Â (Child, Adult, Older Adult)	Phase 3	100	Other	Interventional	Allocation: Randomized|Intervention Model: Sequential Assignment|Masking: Single (Outcomes Assessor)|Primary Purpose: Treatment	20.05.69	2020-10-01	2022-05-01	2022-05-01	May 18, 2020		September 3, 2020	Mansoura University, Mansoura, Select A State Or Province, Egypt		https://ClinicalTrials.gov/show/NCT04392427
44	NCT04373824	Max Ivermectin- COVID 19 Study Versus Standard of Care Treatment for COVID 19 Cases. A Pilot Study		Recruiting	No Results Available	COVID	Drug: Ivermectin	effect of Ivermectin on eradication of virus.	Max Healthcare Insititute Limited	All	18 Years to 75 Years Â (Adult, Older Adult)	Not Applicable	50	Other	Interventional	Allocation: Non-Randomized|Intervention Model: Crossover Assignment|Masking: None (Open Label)|Primary Purpose: Treatment	MHC-COVID-19- INV- ACT-BHR	April 25, 2020	July 25, 2020	July 25, 2020	May 4, 2020		May 4, 2020	Max Super Speciality hospital, Saket (A unit of Devki Devi Foundation), New Delhi, Delhi, India		https://ClinicalTrials.gov/show/NCT04373824
45	NCT04701710	Prophylaxis Covid-19 in Healthcare Agents by Intensive Treatment With Ivermectin and Iota-carrageenan	Ivercar-Tuc	Completed	No Results Available	Covid19|SARS (Severe Acute Respiratory Syndrome)	Drug: Ivermectin / Iota-Carrageenan	Pearson's Chi-square and proportion test.|Odd Ratio, probabilistic test|Logistic regression test	Maria de los Angeles Peral de Bruno|Ministry of Public Health, Argentina	All	18 Years to 60 Years Â (Adult)	Phase 1|Phase 2	300	Other	Interventional	Allocation: Randomized|Intervention Model: Parallel Assignment|Masking: None (Open Label)|Primary Purpose: Prevention	5076-410-CH2020	October 15, 2020	December 18, 2020	December 31, 2020	January 8, 2021		February 23, 2021	SI.PRO.SA, Ministerio de Salud PÃºblica, TucumÃ¡n, Argentina		https://ClinicalTrials.gov/show/NCT04701710
46	NCT05045937	Observational Study on the Use of Ivermectin as an Outpatient Treatment Option for COVID-19		Not yet recruiting	No Results Available	Covid19|COVID-19 Pneumonia|COVID-19 Respiratory Infection|COVID-19 Acute Bronchitis	Drug: Ivermectin	Complete recovery from COVID-19 with resolution of symptoms|Admission to a hospital for further advanced treatment	Patrick Robinson|Patrick Robinson MD LLC	All	12 Years to 110 Years Â (Child, Adult, Older Adult)		1000	Other	Observational	Observational Model: Cohort|Time Perspective: Prospective	Ivermectin Treatment Study #1	September 20, 2021	September 20, 2023	September 20, 2023	September 16, 2021		September 17, 2021	Patrick Robinson MD LLC, San Antonio, Florida, United States		https://ClinicalTrials.gov/show/NCT05045937
47	NCT04836299	Clinical Trial to "Study the Efficacy and Therapeutic Safety of Ivermectin: (SAINTBO)	SAINTBO	Not yet recruiting	No Results Available	Covid19	Drug: Ivermectin|Drug: Placebo	Evolution of viral load|Clinical remission|Clinical signs of toxicity	Universidad Mayor de San SimÃ³n|Barcelona Institute for Global Health|UniversitÃ© Catholique de Louvain	All	18 Years to 75 Years Â (Adult, Older Adult)	Phase 2	90	Other	Interventional	Allocation: Randomized|Intervention Model: Parallel Assignment|Masking: Double (Participant, Care Provider)|Primary Purpose: Treatment	RCT01	May 8, 2021	July 8, 2021	December 5, 2021	April 8, 2021		April 8, 2021	Universidad Mayor de San SimÃ³n, Cochabamba, Bolivia		https://ClinicalTrials.gov/show/NCT04836299
48	NCT04390022	Sars-CoV-2/COVID-19 Ivermectin Navarra-ISGlobal Trial	SAINT	Completed	Has Results	Covid-19|Coronavirus Infection|SARS-CoV-2 Infection	Drug: Ivermectin|Drug: Placebo	Proportion of Patients With a Positive SARS-CoV-2 PCR|Median Viral Load|Fever and Cough Progression|Seroconversion at Day 21|Proportion of Drug-related Adverse Events|Levels of IgG, IgM and IgA|Frequency of Innate Immune Cells|Frequency SARS-CoV-2-specific CD4+ T and and CD8+ T Cells|Results From Cytokine Human Magnetic 30-Plex Panel	Clinica Universidad de Navarra, Universidad de Navarra|Barcelona Institute for Global Health	All	18 Years to 59 Years Â (Adult)	Phase 2	24	Other	Interventional	Allocation: Randomized|Intervention Model: Parallel Assignment|Masking: Double (Participant, Investigator)|Primary Purpose: Treatment	SAINT	July 31, 2020	September 17, 2020	October 9, 2020	May 15, 2020	December 17, 2020	December 17, 2020	Clinica Universidad de Navarra, Pamplona, Navarra, Spain	"Statistical Analysis Plan", https://ClinicalTrials.gov/ProvidedDocs/22/NCT04390022/SAP_000.pdf|"Study Protocol", https://ClinicalTrials.gov/ProvidedDocs/22/NCT04390022/Prot_001.pdf	https://ClinicalTrials.gov/show/NCT04390022
49	NCT04673214	Evaluation of Prognostic Modification in COVID-19 Patients in Early Intervention Treatment		Completed	Has Results	Covid19	Drug: Azithromycin / Ivermectin / Ribaroxaban / Paracetamol|Drug: Azithromycin / Ribaroxaban / Paracetamol	Average Days in COVID-19 Symptoms by Type of Therapy in the UMF 20 and UMF 13 of the IMSS.|Crosstabulated Outcome in Modification of the Evolution Clinical vs Fails Therapeutic by Type of Treatment in Patients With COVID-19 UMF 13 and UMF 20 of the IMSS	Gilberto Cruz Arteaga|CoordinaciÃ³n de InvestigaciÃ³n en Salud, Mexico	All	18 Years and older Â (Adult, Older Adult)	Phase 3	114	Other	Interventional	Allocation: Randomized|Intervention Model: Parallel Assignment|Masking: Single (Participant)|Primary Purpose: Treatment	R-2020-785-176	December 16, 2020	February 25, 2021	February 25, 2021	December 17, 2020	August 16, 2021	August 16, 2021	Alma Italia Guerrero Martinez, Mexico, Distrito Federal, Mexico	"Study Protocol and Statistical Analysis Plan", https://ClinicalTrials.gov/ProvidedDocs/14/NCT04673214/Prot_SAP_000.pdf|"Informed Consent Form", https://ClinicalTrials.gov/ProvidedDocs/14/NCT04673214/ICF_001.pdf	https://ClinicalTrials.gov/show/NCT04673214
50	NCT04434144	A Comparative Study on Ivermectin and Hydroxychloroquine on the COVID19 Patients in Bangladesh		Completed	No Results Available	Ivermectin|Hydroxychloroquine|COVID19	Drug: Ivermectin + Doxycycline|Drug: Hydroxychloroquine + Azithromycin	Number of participants with "treatment success" determine by a negative RT PCR for COVID19.|Number of participants with "adverse effects" determined by the existence of the pharmacological side effects of the particular drug during treatment.	Upazila Health & Family Planning Officer's (UHFPO) Office, Chakoria, Cox's Bazar	All	16 Years to 80 Years Â (Child, Adult, Older Adult)		116	Other	Observational	Observational Model: Case-Only|Time Perspective: Prospective	10000918	May 2, 2020	June 5, 2020	June 5, 2020	June 16, 2020		June 16, 2020	Chakoria Upazilla Health Complex, Cox's Bazar, Bangladesh		https://ClinicalTrials.gov/show/NCT04434144
51	NCT04472585	Efficacy of Subcutaneous Ivermectin With or Without Zinc in COVID-19 Patients	SIZI-COVID-PK	Recruiting	No Results Available	Coronavirus Infection|COVID|Sars-CoV2	Drug: Ivermectin Injectable Solution|Other: Injectable Placebo|Drug: Zinc|Drug: Placebo empty capsule|Drug: Oral Ivermectin	qRT-PCR|Time taken for alleviation of symptoms|Severity of symptoms|Morality	Sohaib Ashraf|Sheikh Zayed Federal Postgraduate Medical Institute	All	18 Years to 60 Years Â (Adult)	Phase 1|Phase 2	180	Other	Interventional	Allocation: Randomized|Intervention Model: Parallel Assignment|Masking: Quadruple (Participant, Care Provider, Investigator, Outcomes Assessor)|Primary Purpose: Treatment	SZMC/IRB/Internal/215/2020	November 14, 2020	August 15, 2021	October 30, 2021	July 15, 2020		February 17, 2021	Ali Clinic, Lahore, MA, Pakistan|Shaikh Zayed Hospital, Lahore, Punjab, Pakistan		https://ClinicalTrials.gov/show/NCT04472585
52	NCT04403555	Ivermectin as a Novel Therapy in COVID-19 Treatment		Completed	No Results Available	COVID	Drug: Ivermectin	The number of patients with mortality|Length of hospital stay|The need for mechanical ventilation	Tanta University	All	Child, Adult, Older Adult	Phase 2|Phase 3	164	Other	Interventional	Allocation: Randomized|Intervention Model: Parallel Assignment|Masking: None (Open Label)|Primary Purpose: Treatment	tanta covid treatment	June 1, 2020	October 31, 2020	December 1, 2020	May 27, 2020		August 2, 2021	Sherief Abd-Elsalam, Tanta, Egypt		https://ClinicalTrials.gov/show/NCT04403555
53	NCT04447235	Early Treatment With Ivermectin and LosarTAN for Cancer Patients With COVID-19 Infection	TITAN	Recruiting	No Results Available	Cancer|COVID|Coronavirus Infection	Drug: Placebo|Drug: Ivermectin|Drug: Losartan	Incidence of severe complications due COVID-19 infection|Incidence of Severe Acute Respiratory Syndrome|Adverse events|Overall survival	Instituto do Cancer do Estado de SÃ£o Paulo	All	18 Years and older Â (Adult, Older Adult)	Phase 2	176	Other	Interventional	Allocation: Randomized|Intervention Model: Parallel Assignment|Masking: Double (Participant, Care Provider)|Primary Purpose: Treatment	NP 1677/20	July 23, 2020	2020-12-01	2021-02-01	June 25, 2020		July 29, 2020	Instituto do Cancer do Estado de Sao Paulo, SAo Paulo, Brazil		https://ClinicalTrials.gov/show/NCT04447235
54	NCT05076253	Efficacy of Ivermectin in COVID-19		Completed	No Results Available	Safety|SARS-CoV2 Infection|Ivermectin Poisoning|Effect of Drug	Drug: Ivermectin|Drug: Placebo	Viral clearance of SARS- CoV-2 intervention|Duration of hospitalization|frequency of clinical worsening|Mechanical ventilation|Mortality rate	Bangkok Metropolitan Administration Medical College and Vajira Hospital	All	18 Years to 80 Years Â (Adult, Older Adult)	Phase 1|Phase 2	72	Other	Interventional	Allocation: Randomized|Intervention Model: Factorial Assignment|Masking: Triple (Participant, Care Provider, Investigator)|Primary Purpose: Treatment	171/64	September 1, 2021	December 1, 2021	December 1, 2021	October 13, 2021		December 15, 2021	Thananda Trakarnvanich, Bangkok, Thailand		https://ClinicalTrials.gov/show/NCT05076253
55	NCT04445311	Ivermectin in Treatment of COVID-19		Recruiting	No Results Available	COVID	Drug: Ivermectin	time to be symptoms free|hospitalization|Mechanical ventilation|length of stay|mortality	Zagazig University	All	18 Years to 70 Years Â (Adult, Older Adult)	Phase 2|Phase 3	100	Other	Interventional	Allocation: Randomized|Intervention Model: Parallel Assignment|Masking: None (Open Label)|Primary Purpose: Treatment	ZU-IRB#6151/31-5-2020	May 31, 2020	July 30, 2020	August 15, 2020	June 24, 2020		June 24, 2020	Waheed Shouman, Zagazig, Sharkia, Egypt		https://ClinicalTrials.gov/show/NCT04445311
56	NCT04392713	Efficacy of Ivermectin in COVID-19		Recruiting	No Results Available	COVID	Drug: Ivermectin 6 MG Oral Tablet (2 tablets)	Negative PCR|Need for mechanical ventilation	Combined Military Hospital, Pakistan	All	15 Years to 65 Years Â (Child, Adult, Older Adult)	Not Applicable	100	Other	Interventional	Allocation: Randomized|Intervention Model: Parallel Assignment|Masking: None (Open Label)|Primary Purpose: Treatment	IVE-COV	April 15, 2020	2020-07-01	2020-07-01	May 19, 2020		May 19, 2020	Combined Military Hospital Lahore, Lahore, Punjab, Pakistan		https://ClinicalTrials.gov/show/NCT04392713
57	NCT04351347	The Efficacy of Ivermectin in Larger Doses in COVID-19 Treatment		Recruiting	No Results Available	COVID	Drug: Ivermectin	Number of patients with improvement or died	Tanta University	All	Child, Adult, Older Adult	Phase 2|Phase 3	300	Other	Interventional	Allocation: Randomized|Intervention Model: Parallel Assignment|Masking: None (Open Label)|Primary Purpose: Treatment	ivermecin covid	June 16, 2020	December 1, 2030	December 1, 2030	April 17, 2020		March 10, 2021	Tanta University, Tanta, Egypt		https://ClinicalTrials.gov/show/NCT04351347
58	NCT04435587	Ivermectin vs Combined Hydroxychloroquine and Antiretroviral Drugs (ART) Among Asymptomatic COVID-19 Infection	IDRA-COVID19	Recruiting	No Results Available	Asymptomatic Infections|SARS-CoV2 Infection	Drug: Ivermectin Pill|Drug: Combined ART/hydroxychloroquine	Adverse event rates|Efficacy for shortening duration of SAR-CoV2 detection by PCR|Antibody detection rates	Mahidol University	All	18 Years and older Â (Adult, Older Adult)	Phase 4	80	Other	Interventional	Allocation: Randomized|Intervention Model: Parallel Assignment|Masking: Single (Outcomes Assessor)|Primary Purpose: Treatment	323/2563 (IRB3)	July 13, 2020	2021-06-01	2021-11-01	June 17, 2020		January 11, 2021	Siriraj Hospital, Bangkok Noi, Bangkok, Thailand|Siriaj Hospital, Bangkok, N/A = Not Applicable, Thailand|Sireethorn Nimitvilai, Amphoe Maueng, Nakhonpathom, Thailand|Golden Jubilee Medical Center, Phutthamonthon District, Nakhonpathom, Thailand		https://ClinicalTrials.gov/show/NCT04435587
59	NCT04422561	Prophylactic Ivermectin in COVID-19 Contacts		Completed	Has Results	COVID	Drug: Ivermectin Tablets	Development of Symptoms ( Fever ,Cough, Sore Throat, Myalgia,Diarrhea, Shortness of Breath)|Development of COVID	Zagazig University	All	16 Years to 70 Years Â (Child, Adult, Older Adult)	Phase 2|Phase 3	340	Other	Interventional	Allocation: Randomized|Intervention Model: Sequential Assignment|Masking: None (Open Label)|Primary Purpose: Prevention	ZU-IRB#6150/31-5-2020	May 31, 2020	July 14, 2020	July 27, 2020	June 9, 2020	August 27, 2020	August 27, 2020	Zagazig University, Zagazig, Sharkia, Egypt	"Study Protocol and Statistical Analysis Plan", https://ClinicalTrials.gov/ProvidedDocs/61/NCT04422561/Prot_SAP_000.pdf	https://ClinicalTrials.gov/show/NCT04422561
60	NCT04635943	Randomized Phase IIA Clinical Trial to Evaluate the Efficacy of Ivermectin to Obtain Negative PCR Results in Patients With Early Phase COVID-19	SAINT-PERU	Completed	No Results Available	Covid19|Coronavirus Infection|SARS-CoV Infection	Drug: Ivermectin|Drug: Placebo	Proportion of patients with a positive SARS-CoV-2 PCR.|Mean viral load|Fever and cough progression|Seroconversion at day 21|Proportion of drug-related adverse events|Levels of IgG, IgM and IgA|Frequency of innate immune cells|Frequency SARS-CoV-2-specific CD4+ T and and CD8+ T cells|Results from cytokine Human Magnetic 30-Plex Panel|Presence of intestinal helminths	Universidad Peruana Cayetano Heredia|Barcelona Institute for Global Health	All	18 Years to 90 Years Â (Adult, Older Adult)	Phase 2	186	Other	Interventional	Allocation: Randomized|Intervention Model: Parallel Assignment|Masking: Triple (Participant, Investigator, Outcomes Assessor)|Primary Purpose: Treatment	EC-CNTEI-014-2020	August 29, 2020	April 30, 2021	April 30, 2021	November 19, 2020		December 6, 2021	Hospital Nacional Cayetano Heredia, Lima, Peru		https://ClinicalTrials.gov/show/NCT04635943
61	NCT04747678	Adverse Effects of Ivermectin Used in Egypt During COVID-19		Enrolling by invitation	No Results Available	Covid19|Ivermectin Poisoning|Drug Toxicity|Drug Side Effect	Drug: Ivermectin	all adverse effects will be collected from people used Ivermectin in between September 2020 to December 2020|all data will be arranged according to time and dose manner	Menoufia University	All	16 Years to 80 Years Â (Child, Adult, Older Adult)		200	Other	Observational	Observational Model: Case-Crossover|Time Perspective: Cross-Sectional	ahmed19782020	February 3, 2021	February 28, 2021	March 1, 2021	February 10, 2021		February 10, 2021	Ahmed Mansour, ShibÄ«n Al Kawm, Menoufia, Egypt		https://ClinicalTrials.gov/show/NCT04747678
62	NCT04891250	The Zambia Ivermectin Trial for the Treatment and Prevention of COVID-19	ZIT	Withdrawn	No Results Available	SARS-CoV-2|Ivermectin	Drug: Ivermectin|Other: Prophylaxis	All-cause COVID-19 related mortality|COVID-19 Infection|Patient cure rate|Participant Infection Rate	Centre for Infectious Disease Research in Zambia|Ministry of Health, Zambia|University of Zambia	All	18 Years to 65 Years Â (Adult, Older Adult)	Phase 4	0	Other	Interventional	Allocation: Randomized|Intervention Model: Parallel Assignment|Masking: None (Open Label)|Primary Purpose: Treatment	ZIT	2021-10-01	2021-12-01	2022-06-01	May 18, 2021		February 3, 2022	University of Zambia, Lusaka, Zambia		https://ClinicalTrials.gov/show/NCT04891250
63	NCT04399746	Ivermectin-Azithromycin-Cholecalciferol (IvAzCol) Combination Therapy for COVID-19	IvAzCol	Recruiting	No Results Available	COVID	Drug: Ivermectin|Drug: Azithromycin|Drug: Cholecalciferol	Viral clearance|Symptoms duration|SpO2|SpO2/FiO2	Instituto de Seguridad y Servicios Sociales de los Trabajadores del Estado	All	18 Years to 90 Years Â (Adult, Older Adult)	Not Applicable	30	Other	Interventional	Allocation: Non-Randomized|Intervention Model: Parallel Assignment|Masking: None (Open Label)|Primary Purpose: Treatment	IvAzCol	March 15, 2020	May 20, 2020	June 10, 2020	May 22, 2020		May 22, 2020	Outpatient treatment, Mexico City, Mexico		https://ClinicalTrials.gov/show/NCT04399746
64	NCT04425863	Ivermectin, Aspirin, Dexamethasone and Enoxaparin as Treatment of Covid 19	IDEA	Completed	Has Results	Severe Acute Respiratory Syndrome|Ventilation Pneumonitis	Drug: Ivermectin 5 MG/ML oral solution, Aspirin 250 mg tablets|Other: Ivermectin 5 mg/mL oral solution, Dexamethasone 4-mg injection, Aspirin 250 mg tablets|Other: Ivermectin 5 MG/ML oral solution, Dexamethasone 4-mg injection, Enoxaparin injection. Inpatient treatment with mechanical ventilation in ICU.	Patients Who Improved Their Condition or Did Not Worsen it|ICU-treated Patients After 2-week Treatment|Mortality|Patients Needing Drug Dose Adjustment|Adverse Events	Eurnekian Public Hospital	All	5 Years and older Â (Child, Adult, Older Adult)		167	Other	Observational	Observational Model: Cohort|Time Perspective: Prospective	IDEA	May 1, 2020	August 30, 2020	August 30, 2020	June 11, 2020	October 19, 2020	October 19, 2020	Hospital Eurnekian, Buenos Aires, Argentina	"Study Protocol and Statistical Analysis Plan", https://ClinicalTrials.gov/ProvidedDocs/63/NCT04425863/Prot_SAP_000.pdf	https://ClinicalTrials.gov/show/NCT04425863
65	NCT04779047	Comparative Therapeutic Efficacy and Safety of Different Antiviral and Anti Inflammatory Drugs in COVID-19 Patients.		Recruiting	No Results Available	Covid19|Pneumonia	Drug: Remdesivir|Drug: Hydroxychloroquine|Drug: Tocilizumab|Drug: Lopinavir/ Ritonavir|Drug: Ivermectin	Percentage of clinical cure in each arm	October 6 University|Beni-Suef University	All	18 Years to 88 Years Â (Adult, Older Adult)	Phase 4	150	Other	Interventional	Allocation: Randomized|Intervention Model: Parallel Assignment|Masking: None (Open Label)|Primary Purpose: Treatment	REC-H-PhBSU-21011	October 1, 2020	March 10, 2021	April 5, 2021	March 3, 2021		March 17, 2021	Beni-suef University, BanÄ« Suwayf, Egypt		https://ClinicalTrials.gov/show/NCT04779047
66	NCT04446104	A Preventive Treatment for Migrant Workers at High-risk of COVID-19		Completed	No Results Available	Covid-19	Drug: Hydroxychloroquine Sulfate Tablets|Drug: Ivermectin 3mg Tab|Drug: Zinc|Drug: Povidone-Iodine|Dietary Supplement: Vitamin C	Laboratory-confirmed COVID-19 in treatment arms (hydroxychloroquine, ivermectin, zinc and povidone iodine)|Acute respiratory illness in treatment arms (hydroxychloroquine, ivermectin, zinc and povidone iodine)|Febrile respiratory illness in treatment arms (hydroxychloroquine, ivermectin, zinc and povidone iodine)|Rate of hospitalization for COVID-19 and non-COVID-19 related indications in treatme…	National University Hospital, Singapore	Male	21 Years to 60 Years Â (Adult)	Phase 3	4257	Other	Interventional	Allocation: Randomized|Intervention Model: Parallel Assignment|Masking: None (Open Label)|Primary Purpose: Prevention	2020/00561	May 13, 2020	August 31, 2020	August 31, 2020	June 24, 2020		October 19, 2020	Tuas South Dormitory, Singapore, Singapore		https://ClinicalTrials.gov/show/NCT04446104
67	NCT04632706	Exploratory Ph I Trial of the Active IMP in Healthy Volunteers in Relation to COVID-19		Completed	Has Results	Covid19	Drug: Ivermectin|Drug: Placebo	Pharmacokinetic Concentrations - (Maximum Plasma Concentration [Cmax])|Pharmacokinetic Concentrations - (Time to Reach Cmax [Tmax])|Pharmacokinetic Concentrations - (Area Under the Plasma Concentration-time Curve From Zero to 24 Hours [AUC0-24hr])|Pharmacokinetic Concentrations - (Apparent Terminal Half-Life [T1/2])|Safety and Tolerability - Treatment Emergent Adverse Events (TEAEs)	MedinCell S.A	Male	18 Years to 45 Years Â (Adult)	Phase 1	24	Industry	Interventional	Allocation: Randomized|Intervention Model: Sequential Assignment|Masking: Double (Participant, Investigator)|Primary Purpose: Other	mdc-TTG-CT-001	September 22, 2020	March 9, 2021	March 9, 2021	November 17, 2020	December 27, 2021	December 27, 2021	MAC Clinical Research Manchester (Early Phase Unit), Neuroscience Centre of Excellence, Manchester, Greater Mancherster, United Kingdom	"Study Protocol", https://ClinicalTrials.gov/ProvidedDocs/06/NCT04632706/Prot_000.pdf|"Statistical Analysis Plan", https://ClinicalTrials.gov/ProvidedDocs/06/NCT04632706/SAP_001.pdf	https://ClinicalTrials.gov/show/NCT04632706
68	NCT04885530	ACTIV-6: COVID-19 Study of Repurposed Medications		Recruiting	No Results Available	Covid19	Drug: Ivermectin|Drug: Fluvoxamine|Drug: Fluticasone|Other: Placebo	Number of hospitalizations as measured by patient reports.|Number of deaths as measured by patient reports|Number of symptoms as measured by patient reports|Change in COVID Clinical Progression Scale|Number of hospitalizations as measured by patient reports|Number of Symptom Resolutions as measured by patient reports|Change in Quality of Life (QOL) as measured by the PROMIS-29|Composite score of …	Susanna Naggie, MD|National Center for Advancing Translational Science (NCATS)|Vanderbilt University Medical Center|Duke University	All	30 Years and older Â (Adult, Older Adult)	Phase 3	15000	Other|NIH	Interventional	Allocation: Randomized|Intervention Model: Parallel Assignment|Masking: Double (Participant, Care Provider)|Primary Purpose: Treatment	Pro00107921|3U24TR001608-05W1	June 8, 2021	2022-12-01	2023-03-01	May 13, 2021		December 23, 2021	Lamb Health, LLC, Gilbert, Arizona, United States|First Care Medical Clinic, Mesa, Arizona, United States|Trident Health Center, Peoria, Arizona, United States|Hoag Memorial Hospital Presbyterian, Newport Beach, California, United States|Assuta Family Medical Group APMC, North Hollywood, California, United States|Doctors Medical Group of Colorado Springs, P.C., Colorado Springs, Colorado, United …		https://ClinicalTrials.gov/show/NCT04885530
69	NCT04510194	COVID-OUT: Early Outpatient Treatment for SARS-CoV-2 Infection (COVID-19)		Recruiting	No Results Available	Covid19|SARS-CoV Infection	Drug: Metformin|Drug: Placebo|Drug: Fluvoxamine|Drug: Ivermectin	Clinical Progression|Maximum symptom severity|Clinical Progression Scale|Time to meaningful recovery|Laboratory Outcome Subsidy - Viral Load|Laboratory Outcome Subsidy|Laboratory Outcome Subsidy - Microbiome|Portion of participants with Post-Acute Sequelae of SARS-CoV-2 infection (PASC)	University of Minnesota|UnitedHealth Group|Northwestern University|Hennepin County Medical Center, Minneapolis|University of Colorado, Denver|Olive View-UCLA Education & Research Institute	All	30 Years to 85 Years Â (Adult, Older Adult)	Phase 3	1350	Other|Industry	Interventional	Allocation: Randomized|Intervention Model: Factorial Assignment|Masking: Quadruple (Participant, Care Provider, Investigator, Outcomes Assessor)|Primary Purpose: Treatment	GIM-2020-29324	January 1, 2021	2022-02-01	2023-02-01	August 12, 2020		January 26, 2022	Olive View UCLA Medical Center, Sylmar, California, United States|Anschutz Health and Wellness Center, Aurora, Colorado, United States|New West Physicians, Golden, Colorado, United States|Northwestern University Feinberg School of Medicine, Chicago, Illinois, United States|American Health Network of Indiana, Greenfield, Indiana, United States|Hennepin County Medical Center, Minneapolis, Minnesota…	"Study Protocol", https://ClinicalTrials.gov/ProvidedDocs/94/NCT04510194/Prot_000.pdf	https://ClinicalTrials.gov/show/NCT04510194
70	NCT05056883	A Phase III Confirmatory Study of K-237		Recruiting	No Results Available	Covid19	Drug: K-237 0.3-0.4mg/kg (once daily)|Drug: Placebo 0.3-0.4mg/kg (once daily)	Time from the start of study drug administration to 168 hours until the clinical symptoms reach an improving trend|In addition to the primary endpoint, time to trend toward improvement in clinical symptoms, including headache, abdominal pain, nasal|Time to reach a temperature of less than 37.5 ËšC without the use of antipyretics (acetaminophen)	Kowa Company, Ltd.	All	20 Years and older Â (Adult, Older Adult)	Phase 3	1000	Industry	Interventional	Allocation: Randomized|Intervention Model: Parallel Assignment|Masking: Quadruple (Participant, Care Provider, Investigator, Outcomes Assessor)|Primary Purpose: Treatment	K-237-01	November 12, 2021	March 31, 2022	March 31, 2022	September 27, 2021		November 15, 2021	Tokyo Medical University Hachioji Medical Center, Tokyo, Hachioji-shi, Japan		https://ClinicalTrials.gov/show/NCT05056883
71	NCT04727424	Repurposed Approved and Under Development Therapies for Patients With Early-Onset COVID-19 and Mild Symptoms		Recruiting	No Results Available	Covid19|SARS-Associated Coronavirus	Drug: Fluvoxamine Maleate 100 MG [Luvox]|Drug: Budesonide Powder|Drug: Placebo (mild disease)|Drug: Peginterferon Lambda-1a|Drug: Placebo (SpO2 < 94%)	Rate of fluvoxamine + budesonide, peginterferon Lambda and fluvoxamine in changing the need for emergency care AND observation for more than 06 hours due to the worsening of COVID-19;|Rate of fluvoxamine + budesonide, peginterferon Lambda and fluvoxamine in changing the need for Hospitalization due to COVID-19 progression and related complications, including lower respiratory tract infection (LRT…	Cardresearch|Cytel Inc.|McMaster University|Fastgrants|Eiger BioPharmaceuticals|RainWater Foundation	All	18 Years and older Â (Adult, Older Adult)	Phase 3	4669	Other|Industry	Interventional	Allocation: Randomized|Intervention Model: Parallel Assignment|Masking: Quadruple (Participant, Care Provider, Investigator, Outcomes Assessor)|Primary Purpose: Treatment	TOGETHER_2	January 19, 2021	October 1, 2023	November 1, 2023	January 27, 2021		February 1, 2022	City of Betim, Betim, MG, Brazil|Hospital e Maternidade Santa Rita, Contagem, MG, Brazil|City of Governador Valadares, Governador Valadares, MG, Brazil|City of IbiritÃ©, IbiritÃ©, MG, Brazil|City of Nova Lima, Nova Lima, MG, Brazil|City of Santa Luzia, Santa Luzia, MG, Brazil|City of Sete Lagoas, Sete Lagoas, MG, Brazil|CARDRESEARCH - Cardiologia Assistencial e de Pesquisa, Belo Horizonte, Minas …		https://ClinicalTrials.gov/show/NCT04727424
72	NCT04384458	Comparative Study of Hydroxychloroquine and Ivermectin in COVID-19 Prophylaxis		Recruiting	No Results Available	Coronavirus Infections	Drug: Hydroxychloroquine|Drug: Ivermectin	Proportion of participants in whom there was a positivity for SARS-CoV-2.|Participants who developed mild, moderate, or severe forms of COVID-19.|Measurement of the QT interval.|Widening of the corrected QT interval or with changes in heart rate on the ECG.|Comparison of hematological and biochemical parameters.|Occurrence of adverse events.|Assessment of COVID-19 symptom severity.|Proportion of …	Nucleo De Pesquisa E Desenvolvimento De Medicamentos Da Universidade Federal Do Ceara	All	18 Years to 70 Years Â (Adult, Older Adult)	Not Applicable	400	Other	Interventional	Allocation: Randomized|Intervention Model: Parallel Assignment|Masking: None (Open Label)|Primary Purpose: Prevention	HCQ+IVM	July 20, 2020	September 10, 2020	2021-04-01	May 12, 2020		October 6, 2020	Drug Research and Development Center (NPDM), Federal University of CearÃ¡ (UFC), Fortaleza, CearÃ¡, Brazil		https://ClinicalTrials.gov/show/NCT04384458
73	NCT04374019	Novel Agents for Treatment of High-risk COVID-19 Positive Patients		Terminated	Has Results	COVID|Sars-CoV2	Drug: Ivermectin|Drug: Camostat Mesilate|Dietary Supplement: Artemesia annua|Drug: Artesunate	Clinical Deterioration|Change in Viral Load|Rate of Organ Failure|Progression to ICU Care or Ventilation|Number of Participants Who Had a Change in Clinical Status Measured by Decrease in COVID 7-point Ordinal Scale|Mortality|Rate of Severe Adverse Events|Number of Patients That Required Oxygen Supplementation|Number of Patients That Required Mechanical Ventilation|Number of Patients Who Required…	Susanne Arnold|University of Kentucky	All	18 Years to 99 Years Â (Adult, Older Adult)	Phase 2	13	Other	Interventional	Allocation: Randomized|Intervention Model: Parallel Assignment|Masking: None (Open Label)|Primary Purpose: Treatment	MCC-20-COVID-01-PMC	May 1, 2020	December 21, 2020	January 12, 2022	May 5, 2020	January 20, 2022	January 20, 2022	University of Kentucky Markey Cancer Center, Lexington, Kentucky, United States	"Study Protocol and Statistical Analysis Plan", https://ClinicalTrials.gov/ProvidedDocs/19/NCT04374019/Prot_SAP_000.pdf	https://ClinicalTrials.gov/show/NCT04374019
74	NCT04431466	A Study to Compare the Efficacy and Safety of Different Doses of Ivermectin for COVID-19	IFORS	Terminated	No Results Available	Coronavirus Infection	Drug: Ivermectin|Other: Standard of Care	Undetectable viral load during 7 days of follow-up.|Viral load variation in the nasopharyngeal swab.|Time to undetectable SARS-CoV-2 viral load in the nasopharyngeal swab.|Incidence of Treatment-Emergent Self-reported Adverse Events|Incidence of Treatment-Emergent Laboratory-based Adverse Events	Universidade Federal de Sao Carlos	All	18 Years and older Â (Adult, Older Adult)	Phase 2	32	Other	Interventional	Allocation: Randomized|Intervention Model: Parallel Assignment|Masking: None (Open Label)|Primary Purpose: Treatment	IFORS	July 1, 2020	December 1, 2020	December 1, 2020	June 16, 2020		October 12, 2021	Hospital UniveristÃ¡rio da Universidade Federal de SÃ£o Carlos (HU-UFSCar), SÃ£o Carlos, SÃ£o Paulo, Brazil|Hospital UniversitÃ¡rio da Universidade Federal de SÃ£o Carlos (HU-UFSCar), SÃ£o Carlos, SÃ£o Paulo, Brazil		https://ClinicalTrials.gov/show/NCT04431466
75	NCT04951362	Role of Ivermectin Nanosuspension as Nasal Spray in Treatment of Persistant Post covid19 Anosmia		Recruiting	No Results Available	Anosmia	Drug: ivermectin nasal spray	regaining of smell	South Valley University	All	18 Years to 70 Years Â (Adult, Older Adult)	Phase 2|Phase 3	117	Other	Interventional	Allocation: Randomized|Intervention Model: Parallel Assignment|Masking: None (Open Label)|Primary Purpose: Treatment	SVU MED CIT0 23 4 21 1 122	April 20, 2021	September 12, 2021	September 12, 2021	July 6, 2021		September 17, 2021	Zaky Aref, Qina, Egypt		https://ClinicalTrials.gov/show/NCT04951362
76	NCT04703608	Prevention and Treatment for COVID -19 (Severe Acute Respiratory Syndrome Coronavirus 2 SARS-CoV-2) Associated Severe Pneumonia in the Gambia	PaTS-COVID	Recruiting	No Results Available	Covid-19	Drug: Ivermectin|Drug: ASP|Drug: Placebo	Cohort 1 Index Case: Percentage of patients with COVID-19 associated mild disease/moderate pneumonia progressing to severe pneumonia [Time frame 14 days]|Cohort 1 Household contacts: Percentage of HH members that get infected with SARS-CoV-2 [Time frame 14 days]|Cohort 2: Percentage of COVID-19 associated severe pneumonia patients worsening their condition [Time frame at discharge or day 28 (whic…	London School of Hygiene and Tropical Medicine	All	5 Years and older Â (Child, Adult, Older Adult)	Phase 3	1200	Other	Interventional	Allocation: Randomized|Intervention Model: Parallel Assignment|Masking: Single (Participant)|Primary Purpose: Treatment	LEO 22628	January 22, 2021	2022-03-01	2022-07-01	January 11, 2021		June 4, 2021	Mrcg@Lshtm, Fajara, Gambia		https://ClinicalTrials.gov/show/NCT04703608
77	NCT04714515	Montelukast - a Treatment Choice for COVID-19		Completed	No Results Available	Covid19|SARS-CoV-2 Infection	Drug: Montelukast|Drug: Hydroxychloroquine|Drug: Ivermectin	Patients admittance to ICU|Length of total stay at the hospital|Alleviating the symptoms of COVID-19|Interleukin levels	University of Sargodha|Shanghai General Hospital, Shanghai Jiao Tong University School of Medicine|Shaukat Khanum Memorial Cancer Hospital & Research Centre|Shanghai Jiao Tong University School of Medicine|Teesside University	All	20 Years to 80 Years Â (Adult, Older Adult)		150	Other	Observational	Observational Model: Cohort|Time Perspective: Retrospective	01032020-7	February 20, 2020	March 30, 2020	April 20, 2020	January 19, 2021		January 19, 2021	Department of Critical Care Medicine, Shanghai General Hospital, Shanghai Jiao Tong University, School of Medicine, Shanghai, China, Shanghai, China|Shaukat Khanum Memorial Cancer Hospital & Research Centre, Johar Town, Lahore, Pakistan, Lahore, Punjab, Pakistan		https://ClinicalTrials.gov/show/NCT04714515
78	NCT05041907	Finding Treatments for COVID-19: A Trial of Antiviral Pharmacodynamics in Early Symptomatic COVID-19 (PLATCOV)	PLATCOV	Recruiting	No Results Available	COVID-19	Drug: Favipiravir|Drug: Monoclonal antibodies|Drug: Ivermectin|Other: No treatment|Drug: Remdesivir	Rate of viral clearance for repurposed drugs|Rate of viral clearance of positive control (monoclonal antibodies) over time relative to the negative control|Rate of viral clearance for small novel molecule drugs|Viral kinetic levels in early COVID-19 disease|Number of antiviral treatment arms that show a positive signal (>90% probability of >5% acceleration in viral clearance)|Rates of viral clear…	University of Oxford	All	18 Years to 50 Years Â (Adult)	Phase 2	750	Other	Interventional	Allocation: Randomized|Intervention Model: Parallel Assignment|Masking: None (Open Label)|Primary Purpose: Treatment	VIR21001	September 30, 2021	2023-08-01	2023-08-01	September 13, 2021		January 28, 2022	Universidade Federal de Minas Gerais, Minas Gerais, Brazil|Vajira hospital, Bangkok, Thailand|Faculty of Tropical Medicine, Mahidol University, Bangkok, Thailand|Bangplee Hospital, Samut Prakan, Thailand		https://ClinicalTrials.gov/show/NCT05041907
79	NCT04482686	Trial of Combination Therapy to Treat COVID-19 Infection		Active, not recruiting	No Results Available	COVID|Covid-19|Corona Virus Infection|Coronavirus Infection|Coronavirus-19|SARS-CoV2|SARS-CoV Infection	Drug: Ivermectin|Drug: Doxycycline Hcl|Dietary Supplement: Zinc|Dietary Supplement: Vitamin D3|Dietary Supplement: Vitamin C	Time to Non-Infectivity by RT-PCR|Time to Symptom progression in days as measured by NEWS scoring system (National Early Warning Score)|Time to Symptom improvement as measured by NEWS scoring system (National Early Warning Score)|Efficacy of Treatment as measured by Titer|Efficacy of Treatment as measured by RT-PCR|Safety of Treatment as Measured by D-Dimer|Safety of Treatment as Measured by Pro-…	ProgenaBiome|Topelia Therapeutics	All	18 Years and older Â (Adult, Older Adult)	Phase 1	31	Other	Interventional	Allocation: Randomized|Intervention Model: Parallel Assignment|Masking: Double (Participant, Investigator)|Primary Purpose: Treatment	PRG-049	December 9, 2020	2022-05-01	2022-07-01	July 22, 2020		November 2, 2021	ProgenaBiome, Ventura, California, United States		https://ClinicalTrials.gov/show/NCT04482686
80	NCT04460547	Worldwide Trends on COVID-19 Research After the Declaration of COVID-19 Pandemic		Not yet recruiting	No Results Available	COVID-19	Drug: Convalescent Plasma Transfusion|Drug: Hydroxychloroquine|Drug: DAS181|Drug: Ivermectin|Drug: Interferon Beta-1A	Geographical distribution of the interventional studies after 11th of March 2020.|Geographical distribution of the Observational studies after 11th of March 2020.|Monthly Research study completion rate as per geographic distribution of the Research.|Statistical correlation of the interventional studies Research with developed, developing and under developed countries.|Statistical correlation of t…	Qassim University	All	1 Year and older Â (Child, Adult, Older Adult)		200	Other	Observational	Observational Model: Cohort|Time Perspective: Retrospective	COAHS	July 25, 2020	August 15, 2020	September 20, 2020	July 7, 2020		July 7, 2020			https://ClinicalTrials.gov/show/NCT04460547
81	NCT04681040	Risk Stratification of COVID-19 Using Urine Biomarkers		Recruiting	No Results Available	Covid19|Urine|Biomarker|Acute Respiratory Failure With Hypoxia		Risk Stratification of COVID-19 Participants Using Urine Biomarkers|Prediction of COVID-19 Treatment by Urine L-FABP|Increase of O2 support, hospital days, worsening of chest X-ray and CT, and survival rate, at 14 and/or 30 days.|Comparison of Risk Stratification with Other Biomarkers	National Center for Global Health and Medicine, Japan	All	20 Years and older Â (Adult, Older Adult)		1000	Other	Observational	Observational Model: Cohort|Time Perspective: Prospective	NCGM-G-003654-00	December 19, 2020	March 31, 2022	August 31, 2023	December 23, 2020		March 15, 2021	MD Mount Sinai, Baltimore, Maryland, United States|Hospital das Clinicas Ribeirao Preto, RibeirÃ£o Preto, San Paulo, Brazil|Danish National Biobank, KÃ¸benhavn, Denmark|Shonan General Hospital, Kamakura, Kanagawa, Japan|National Center Global Health and Medicine, Shinjuku, Tokyo, Japan|Yamanashi Prefectural Central Hospital, KÅfu, Yamanashi, Japan|Unilab Group, Manila, Philippines		https://ClinicalTrials.gov/show/NCT04681040
82	NCT04382846	Novel Regimens in COVID-19 Treatment		Recruiting	No Results Available	COVID|Corona Virus Infection	Drug: Nitazoxanide	Number of patients with virological cure	Tanta University	All	18 Years and older Â (Adult, Older Adult)	Phase 3	160	Other	Interventional	Allocation: Randomized|Intervention Model: Parallel Assignment|Masking: None (Open Label)|Primary Purpose: Treatment	tanta covid treatment	May 8, 2020	December 1, 2030	December 1, 2030	May 11, 2020		December 4, 2020	Tanta University, Assiut University, Tanta, Egypt|Sherief Abd-Elsalam, Tanta, Egypt		https://ClinicalTrials.gov/show/NCT04382846
83	NCT02735707	Randomized, Embedded, Multifactorial Adaptive Platform Trial for Community- Acquired Pneumonia	REMAP-CAP	Recruiting	No Results Available	Community-acquired Pneumonia, Influenza, COVID-19	Drug: Ceftriaxone|Drug: Moxifloxacin or Levofloxacin|Drug: Piperacillin-tazobactam|Drug: Ceftaroline|Drug: Amoxicillin-clavulanate|Drug: Standard course macrolide|Drug: Extended course macrolide|Other: No systemic corticosteroid|Drug: Fixed-duration Hydrocortisone|Drug: Shock-dependent hydrocortisone|Drug: Fixed-duration higher dose Hydrocortisone|Other: No antiviral agent for influenza|Drug: Fiv…	All-cause mortality|Days alive and not receiving organ support in ICU|ICU Mortality|ICU length of stay|Hospital length of stay|Ventilator free days|Organ failure free days|Health-related Quality of life assessment|Proportion of intubated patients who receive a tracheostomy|Destination at time of hospital discharge|Readmission to the index ICU during the index hospitalization|World Health Organisa…	UMC Utrecht|Australian and New Zealand Intensive Care Research Centre|Medical Research Institute of New Zealand|Unity Health|Berry Consultants|Global Coalition for Adaptive Research|University of Pittsburgh Medical Center|Intensive Care National Audit & Research Centre|St. Marianna University School of Medicine|National Intensive Care Surveillance MORU	All	18 Years and older Â (Adult, Older Adult)	Phase 3	10000	Other	Interventional	Allocation: Randomized|Intervention Model: Factorial Assignment|Masking: None (Open Label)|Primary Purpose: Treatment	U1111-1189-1653|2015-002340-14|602525|16/631|APP1101719|158584	April 11, 2016	2023-12-01	2025-12-01	April 13, 2016		December 21, 2021	University of Florida, Jacksonville, Florida, United States|Augusta University, Augusta, Georgia, United States|University of Illinois Health, Chicago, Illinois, United States|Tulane Medical Center, New Orleans, Louisiana, United States|University of Michigan, Ann Arbor, Michigan, United States|Memorial Sloan Kettering Cancer Center, New York, New York, United States|Wake Forest Baptist Health, W…		https://ClinicalTrials.gov/show/NCT02735707

## Sheet: Ruxolitinib
Rank	NCT Number	Title	Acronym	Status	Study Results	Conditions	Interventions	Outcome Measures	Sponsor/Collaborators	Gender	Age	Phases	Enrollment	Funded Bys	Study Type	Study Designs	Other IDs	Start Date	Primary Completion Date	Completion Date	First Posted	Results First Posted	Last Update Posted	Locations	Study Documents	URL
1	NCT04348071	Safety and Efficacy of Ruxolitinib for COVID-19		Withdrawn	No Results Available	COVID-19	Drug: Ruxolitinib	Phase 2: Cumulative incidence of Grade 3 and 4 adverse events (AEs)|Phase 2: Cumulative incidence of serious adverse events (SAEs)|Phase 2: Changes in white blood cell count (CBC) through Day 15|Phase 2: Changes in hemoglobin through Day 15|Phase 2: Changes in platelets through Day 15|Phase 2: Changes in creatinine through Day 15|Phase 2: Changes in glucose through Day 15|Phase 2: Changes in prot…	University of Colorado, Denver	All	18 Years to 89 Years Â (Adult, Older Adult)	Phase 2|Phase 3	0	Other	Interventional	Allocation: N/A|Intervention Model: Single Group Assignment|Masking: None (Open Label)|Primary Purpose: Treatment	20-0869	2021-07-01	2021-08-01	2021-10-01	April 15, 2020		March 8, 2021			https://ClinicalTrials.gov/show/NCT04348071
2	NCT04354714	Ruxolitinib to Combat COVID-19		Withdrawn	No Results Available	COVID-19	Drug: Ruxolitinib|Procedure: Peripheral blood draw	Overall survival|Length of hospital stay|Length of ICU stay|Duration of ventilator use|Duration of vasopressors use|Duration on renal replacement therapy|Viral kinetics as measured by virologic failure|Number of adverse events as measured by CTCAE v. 5.0|Proportion of participants with detectable virus	Washington University School of Medicine|Incyte Corporation	All	18 Years and older Â (Adult, Older Adult)	Phase 2	0	Other|Industry	Interventional	Allocation: N/A|Intervention Model: Single Group Assignment|Masking: None (Open Label)|Primary Purpose: Treatment	04-13-20-DiPersio	June 30, 2020	July 31, 2021	December 31, 2021	April 21, 2020		May 21, 2020			https://ClinicalTrials.gov/show/NCT04354714
3	NCT04377620	Assessment of Efficacy and Safety of Ruxolitinib in Participants With COVID-19-Associated ARDS Who Require Mechanical Ventilation (RUXCOVID-DEVENT)		Terminated	Has Results	COVID-19	Drug: Placebo|Drug: Ruxolitinib	Percentage of Participants Who Have Died Due to Any Cause|Number of Ventilator Free Days|Number of ICU Free Days|Oxygen Free Days|Vasopressor Free Days|Hospital Free Days|Percentage of Participants With at Least 2-point Improvement in the COVID-19 Ordinal Scale|Percentage of Participants With at Least 1-point Improvement in the COVID-19 Ordinal Scale|Time to Improvement From Baseline Category to …	Incyte Corporation	All	12 Years and older Â (Child, Adult, Older Adult)	Phase 3	211	Industry	Interventional	Allocation: Randomized|Intervention Model: Parallel Assignment|Masking: Double (Participant, Investigator)|Primary Purpose: Treatment	INCB 18424-369	May 24, 2020	February 26, 2021	February 26, 2021	May 6, 2020	January 19, 2022	January 19, 2022	Honor Health Research Institute, Scottsdale, Arizona, United States|Sharp Memorial Hospital, San Diego, California, United States|Georgetown University Hospital, Washington, District of Columbia, United States|Teradan Clinical Trials, Brandon, Florida, United States|University of Florida, Gainesville, Florida, United States|Tampa General Hospital, Tampa, Florida, United States|University of South…	"Study Protocol", https://ClinicalTrials.gov/ProvidedDocs/20/NCT04377620/Prot_000.pdf|"Statistical Analysis Plan", https://ClinicalTrials.gov/ProvidedDocs/20/NCT04377620/SAP_001.pdf	https://ClinicalTrials.gov/show/NCT04377620
4	NCT04414098	Ruxolitinib in the Treatment of Covid-19		Not yet recruiting	No Results Available	COVID-19	Drug: INC424 / Ruxolitinib	Evaluate the efficacy of ruxolitinib in the treatment of COVID-19 severe acute respiratory syndrome|Evaluate the median duration of hospitalization.|Evaluate the evolution of systemic inflammation parameters.|Evaluate COVID-19 mortality rate|Evaluate the proportion of the requirement of mechanical ventilation.|Evaluate ruxolitinib adverse reactions|Evaluate the proportion of secondary infections …	Marcelo Iastrebner|Novartis|Clinica Zabala	All	18 Years and older Â (Adult, Older Adult)	Phase 2	100	Other|Industry	Interventional	Allocation: N/A|Intervention Model: Single Group Assignment|Masking: None (Open Label)|Primary Purpose: Treatment	CZabala	June 1, 2020	August 15, 2020	September 15, 2020	June 4, 2020		June 4, 2020			https://ClinicalTrials.gov/show/NCT04414098
5	NCT04355793	Expanded Access Program of Ruxolitinib for the Emergency Treatment of Cytokine Storm From COVID-19 Infection		No longer available	No Results Available	COVID-19	Drug: Ruxolitinib		Incyte Corporation	All	12 Years and older Â (Child, Adult, Older Adult)			Industry	Expanded Access:Treatment IND/Protocol		INCB 18424-MA-COVID-19-301				April 21, 2020		December 15, 2021			https://ClinicalTrials.gov/show/NCT04355793
6	NCT04337359	Ruxolitinib Managed Access Program (MAP) for Patients Diagnosed With Severe/Very Severe COVID-19 Illness		No longer available	No Results Available	Severe/Very Severe COVID-19 Illness	Drug: Ruxolitinib		Novartis Pharmaceuticals|Novartis is the Marketing Authorization Holder for Jakavi outside the US.|Novartis	All	6 Years to 90 Years Â (Child, Adult, Older Adult)			Industry|Other	Expanded Access:Intermediate-size Population		CINC424A2001M				April 7, 2020		January 26, 2021			https://ClinicalTrials.gov/show/NCT04337359
7	NCT04331665	Study of the Efficacy and Safety of Ruxolitinib to Treat COVID-19 Pneumonia		Terminated	No Results Available	COVID-19|Pneumonia	Drug: Ruxolitinib	Proportion of patients with COVID-19 pneumonia who become critically ill (defined as requiring mechanical ventilation and/or FiO2 of 60% of more)|Number of adverse events|All cause mortality rate|Average duration of hospital stay	University Health Network, Toronto	All	12 Years and older Â (Child, Adult, Older Adult)	Not Applicable	3	Other	Interventional	Allocation: N/A|Intervention Model: Single Group Assignment|Masking: None (Open Label)|Primary Purpose: Treatment	U-DEPLOY: RUX-COVID|20-5315	May 21, 2020	January 5, 2021	March 24, 2021	April 2, 2020		August 19, 2021	Princess Margaret Cancer Centre, Toronto, Ontario, Canada		https://ClinicalTrials.gov/show/NCT04331665
8	NCT04334044	Treatment of SARS Caused by COVID-19 With Ruxolitinib		Completed	No Results Available	COVID-19|Severe Acute Respiratory Syndrome Coronavirus 2	Drug: Ruxolitinib Oral Tablet	Recovery of Pneumonia|Response of C-reactive protein|Response of Ferritin|Response of D-dimer|Rate of ICU admission|Rate of mechanical ventilation|Overall Survival|Toxicity Rate	Grupo Cooperativo de HemopatÃ­as Malignas	All	18 Years and older Â (Adult, Older Adult)	Phase 1|Phase 2	77	Other	Interventional	Allocation: N/A|Intervention Model: Single Group Assignment|Masking: None (Open Label)|Primary Purpose: Treatment	HAL 345/2020	September 1, 2020	April 12, 2021	April 30, 2021	April 3, 2020		July 7, 2021	Grupo Cooperativo de HemopatÃ­as Malignas, Huixquilucan, Estado De MÃ©xico, Mexico		https://ClinicalTrials.gov/show/NCT04334044
9	NCT04362137	Study to Assess the Efficacy and Safety of Ruxolitinib in Patients With COVID-19 Associated Cytokine Storm	RUXCOVID	Completed	Has Results	Cytokine Storm (Covid-19)	Drug: Ruxolitinib|Drug: Placebo	Proportion of Patients Who Die, Develop Respiratory Failure [Require Mechanical Ventilation] or Require Intensive Care Unit (ICU) Care|Clinical Status|Percentage of Patients With at Least Two-point Improvement From Baseline in Clinical Status|Percentage of Patients With at Least One-point Improvement From Baseline in Clinical Status|Percentage of Patients With at Least One-point Deterioration Fro…	Novartis Pharmaceuticals|Incyte Corporation|Novartis	All	12 Years and older Â (Child, Adult, Older Adult)	Phase 3	432	Industry	Interventional	Allocation: Randomized|Intervention Model: Parallel Assignment|Masking: Double (Participant, Investigator)|Primary Purpose: Treatment	CINC424J12301|INCB 18424-368|2020-001662-11	May 2, 2020	October 17, 2020	October 17, 2020	April 24, 2020	June 2, 2021	October 11, 2021	Novartis Investigative Site, Fullerton, California, United States|Novartis Investigative Site, Aurora, Colorado, United States|Novartis Investigative Site, Denver, Colorado, United States|Novartis Investigative Site, Atlanta, Georgia, United States|Novartis Investigative Site, Idaho Falls, Idaho, United States|Novartis Investigative Site, Ann Arbor, Michigan, United States|Novartis Investigative …	"Study Protocol", https://ClinicalTrials.gov/ProvidedDocs/37/NCT04362137/Prot_000.pdf|"Statistical Analysis Plan", https://ClinicalTrials.gov/ProvidedDocs/37/NCT04362137/SAP_001.pdf	https://ClinicalTrials.gov/show/NCT04362137
10	NCT04366232	Efficacy of Intravenous Anakinra and Ruxolitinib During COVID-19 Inflammation	JAKINCOV	Terminated	No Results Available	Covid-19	Drug: Anakinra alone (stages 2b/3)|Drug: Anakinra and Ruxolitinib (overcome stage 3)|Other: Standard of care	Biological criteria|Duration of oxygen therapy (days)|Number of intensive care units admissions|Number of days in intensive care units|Mortality rate|Total number of days in hospital|Organ failure score modification (Sepsis-related Organ Failure Assessment (SOFA) score)|Number of bacterial and/or fungal sepsis	Centre Hospitalier Intercommunal de Toulon La Seyne sur Mer|HÃ´pital d'instruction des armÃ©es Sainte-Anne|Assistance Publique Hopitaux De Marseille	All	18 Years and older Â (Adult, Older Adult)	Phase 2	2	Other	Interventional	Allocation: Randomized|Intervention Model: Parallel Assignment|Masking: None (Open Label)|Primary Purpose: Treatment	2020-CHITS-003|2020-001963-10	August 19, 2020	October 2, 2020	October 2, 2020	April 28, 2020		December 16, 2020	AP-HM, HÃ´pital de la Conception, Marseille, Bouches-du-RhÃ´ne, France|HÃ´pital Sainte-Musse, Toulon, VAR, France|Sainte Anne Teaching Military Hospital, Toulon, Var, France		https://ClinicalTrials.gov/show/NCT04366232
11	NCT04338958	Ruxolitinib in Covid-19 Patients With Defined Hyperinflammation	RuxCoFlam	Completed	No Results Available	Covid-19	Drug: Ruxolitinib	overall response rate in reversal of hyperinflammation	University of Jena	All	18 Years and older Â (Adult, Older Adult)	Phase 2	193	Other	Interventional	Allocation: N/A|Intervention Model: Single Group Assignment|Masking: None (Open Label)|Primary Purpose: Treatment	RuxCoFlam	April 22, 2020	July 15, 2021	July 15, 2021	April 8, 2020		August 13, 2021	SRH Wald-Klinikum Gera GmbH, Gera, Germany|University Hospital Jena, Jena, Germany|UKSH, Campus LÃ¼beck, LÃ¼beck, Germany|Klinikum der Landeshauptstadt Stuttgart gKÃ¶R, Stuttgart, Germany|UniversitÃ¤tsklinikum Ulm, Ulm, Germany|Schwarzwald-Baar Klinikum Villingen-Schwenningen GmbH, Villingen-Schwenningen, Germany		https://ClinicalTrials.gov/show/NCT04338958
12	NCT04424056	A Trial Using ANAKINRA, TOCILIZUMAB Alone or in Association With RUXOLITINIB in Severe Stage 2b and 3 of COVID19-associated Disease	INFLAMMACOV	Not yet recruiting	No Results Available	Covid19	Drug: Anakinra +/- Ruxolitinib (stages 2b/3)|Drug: Anakinra and Ruxolitinib (Advanced stage 3)|Drug: Tocilizumab +/- ruxolitinib (stages 2b/3)|Drug: Tocilizumab and Ruxolitinib (Advanced stage 3)|Other: Standard of care	Ventilation free days at D28	Assistance Publique Hopitaux De Marseille	All	18 Years to 75 Years Â (Adult, Older Adult)	Phase 3	216	Other	Interventional	Allocation: Randomized|Intervention Model: Parallel Assignment|Masking: None (Open Label)|Primary Purpose: Treatment	2020-23	September 1, 2020	September 30, 2022	November 1, 2022	June 9, 2020		June 23, 2020	Assistance Publique HÃ´pitaux de Marseille, Marseille, France		https://ClinicalTrials.gov/show/NCT04424056
13	NCT04374149	Therapeutic Plasma Exchange Alone or in Combination With Ruxolitinib in COVID-19 Associated CRS		Completed	Has Results	Cytokine Release Syndrome|COVID19	Procedure: Therapeutic Plasma Exchange|Drug: Ruxolitinib	C-reactive Protein (CRP) Levels at Baseline and Day 14|Cytokine Levels at Baseline and Day 14	Prisma Health-Upstate	All	12 Years to 80 Years Â (Child, Adult, Older Adult)	Phase 2	20	Other	Interventional	Allocation: Non-Randomized|Intervention Model: Sequential Assignment|Masking: None (Open Label)|Primary Purpose: Treatment	PHU COVID-19-001	April 30, 2020	September 30, 2020	December 1, 2020	May 5, 2020	December 2, 2021	December 2, 2021	Prisma Health, Greenville, South Carolina, United States	"Study Protocol and Statistical Analysis Plan", https://ClinicalTrials.gov/ProvidedDocs/49/NCT04374149/Prot_SAP_000.pdf|"Informed Consent Form", https://ClinicalTrials.gov/ProvidedDocs/49/NCT04374149/ICF_001.pdf	https://ClinicalTrials.gov/show/NCT04374149
14	NCT04361903	Ruxolitinib for the Treatment of Acute Respiratory Distress Syndrome in Patients With COVID-19 Infection	RESPIRE	Not yet recruiting	No Results Available	Severe Acute Respiratory Syndrome Coronavirus 2	Drug: Ruxolitinib Oral Tablet	Number of patients who avoid mechanical assisted ventilation in acute respiratory distress syndrome in patients with SARS-CoV-2 COVID-19|Improvement of respiratory performance - Arterial Blood Gas Analisys - pH|Improvement of respiratory performance - Arterial Blood Gas Analisys - pO2|Improvement of respiratory performance - Arterial Blood Gas Analisys - pCO2|Improvement of respiratory performanc…	Azienda USL Toscana Nord Ovest|Fondazione C.N.R./Regione Toscana "G. Monasterio", Pisa, Italy|Azienda Ospedaliera Universitaria Senese|Azienda Ospedaliero, Universitaria Pisana	All	18 Years and older Â (Adult, Older Adult)		13	Other	Observational	Observational Model: Cohort|Time Perspective: Retrospective	2020.COVID-19.RUXO106	April 25, 2020	May 24, 2020	May 31, 2020	April 24, 2020		April 24, 2020			https://ClinicalTrials.gov/show/NCT04361903
15	NCT04359290	Ruxolitinib for Treatment of Covid-19 Induced Lung Injury ARDS	RuXoCoil	Completed	No Results Available	ARDS, Human|COVID	Drug: Ruxolitinib administration	Overall survival|Assessment of the duration of ventilation support|cytokine storm|time on ICU|Number of participants with treatment-related adverse events as assessed by CTCAE v5.0|time frame for seroconversion under ruxolitinib treatment (SARS-Co-19- IgG)|Rates of flow|Gas exchange|Forced expiratory volume in 1 second (FEV1)|Forced vital capacity (FVC)|Tiffeneau-Pinelli index	Philipps University Marburg Medical Center	All	18 Years and older Â (Adult, Older Adult)	Phase 2	15	Other	Interventional	Allocation: N/A|Intervention Model: Single Group Assignment|Masking: None (Open Label)|Primary Purpose: Treatment	KKS-278	July 1, 2020	December 31, 2020	July 30, 2021	April 24, 2020		August 24, 2021	Andreas Neubauer, Marburg, Germany		https://ClinicalTrials.gov/show/NCT04359290
16	NCT04477993	Ruxolitinib for Acute Respiratory Disorder Syndrome Due to COVID-19	RUXO-COVID	Terminated	No Results Available	Severe Acute Respiratory Syndrome Coronavirus 2|SARS-CoV2	Drug: Janus Kinase Inhibitor (ruxolitinib)|Other: Placebo	A composite outcome of death or ICU admission or mechanical ventilation at day 14.|A composite outcome of death or ICU admission or mechanical ventilation at day 28|Time to treatment failure|Overall survival at days 14 and 28|Cumulative incidence of ICU admission rate at days 14 and 28|Cumulative incidence of mechanical ventilation at days 14 and 28|Duration of hospital stay|Duration of ICU stay|…	Vanderson Geraldo Rocha|University of Sao Paulo General Hospital	All	18 Years to 95 Years Â (Adult, Older Adult)	Phase 2|Phase 3	5	Other	Interventional	Allocation: Randomized|Intervention Model: Parallel Assignment|Masking: Quadruple (Participant, Care Provider, Investigator, Outcomes Assessor)|Primary Purpose: Treatment	32894720.3.0000.0068	August 14, 2020	March 29, 2021	March 29, 2021	July 20, 2020		April 8, 2021	Hospital das ClÃ­nicas, Sao Paulo, Brazil		https://ClinicalTrials.gov/show/NCT04477993
17	NCT04403243	COLchicine Versus Ruxolitinib and Secukinumab In Open Prospective Randomized Trial	COLORIT	Recruiting	No Results Available	COVID 19	Drug: Colchicine|Drug: Ruxolitinib 5 MG|Drug: Secukinumab 150 MG/ML Subcutaneous Solution [COSENTYX]|Other: standard therapy	change from baseline in clinical assessment score COVID 19 (CAS COVID 19) Frame: baseline|Combine endpoint: Time to death or mechanical ventilation|C-reactive protein|D-dimer|EuroQol Group. EQ-5Dâ„¢|exposure area on lung CT	Lomonosov Moscow State University Medical Research and Educational Center	All	18 Years and older Â (Adult, Older Adult)	Phase 2	70	Other	Interventional	Allocation: Randomized|Intervention Model: Parallel Assignment|Masking: None (Open Label)|Primary Purpose: Treatment	MSU080520	May 8, 2020	July 22, 2020	August 23, 2020	May 27, 2020		May 27, 2020	Lomonosov Moscow State University Medical Research and Educational Center, Moscow, Moscow Region, Russian Federation		https://ClinicalTrials.gov/show/NCT04403243
18	NCT04581954	Inflammatory Signal Inhibitors for COVID-19 (MATIS)	MATIS	Recruiting	No Results Available	Coronavirus|Covid19|Pneumonia	Drug: Ruxolitinib|Drug: Fostamatinib|Other: Standard of care	All-cause mortality|Number and proportion of patients requiring invasive ventilation|Number and proportion of patients requiring non-invasive ventilation (CPAP and high flow nasal oxygen)|Number and proportion of patients requiring invasive ventilation or extracorporeal membrane oxygenation (ECMO)|Number and proportion of patients requiring non-invasive ventilation including continuous positive a…	Imperial College London|Imperial College Healthcare NHS Trust|Rigel Pharmaceuticals|Novartis	All	18 Years and older Â (Adult, Older Adult)	Phase 1|Phase 2	456	Other|Industry	Interventional	Allocation: Randomized|Intervention Model: Parallel Assignment|Masking: Single (Outcomes Assessor)|Primary Purpose: Treatment	20HH5926|2020-001750-22	October 2, 2020	December 1, 2021	December 1, 2021	October 9, 2020		September 2, 2021	Imperial College Healthcare NHS Trust, London, United Kingdom		https://ClinicalTrials.gov/show/NCT04581954
19	NCT04348695	Study of Ruxolitinib Plus Simvastatin in the Prevention and Treatment of Respiratory Failure of COVID-19.	Ruxo-Sim-20	Recruiting	No Results Available	Coronavirus Infection	Drug: Ruxolitinib plus simvastatin|Other: Standard of Care	Percentage of patients who develop severe respiratory failure.|Length of ICU stay.|Length of hospital stay|Survival rate at 6 months|Survival rate at 12 months|Survival rate at 28 days|Percentage of patients with each AE by grade|Percentage of patients who discontinued due to AEs	FundaciÃ³n de investigaciÃ³n HM|Apices Soluciones S.L.	All	18 Years and older Â (Adult, Older Adult)	Phase 2	94	Other|Industry	Interventional	Allocation: Randomized|Intervention Model: Parallel Assignment|Masking: None (Open Label)|Primary Purpose: Treatment	Ruxo-Sim-20|2020-001405-23	April 12, 2020	May 13, 2020	May 13, 2020	April 16, 2020		April 17, 2020	Hospital Universitario Madrid Sanchinarro, Madrid, Spain		https://ClinicalTrials.gov/show/NCT04348695
20	NCT04351503	A Systems Approach to Predict the Outcome of SARS-CoV-2 in the Population of a City; COVID-19		Recruiting	No Results Available	SARS Coronavirus (SARS-CoV-2) Infection	Other: Study A|Other: Study B|Other: Study C|Other: Study D	Identification of factors associated with (i) infection (binary, yes/no), (ii) hospitalization (binary, yes/no), (iii) requirement for ICU treatment (binary, yes/no)|duration of hospitalization (in days)|duration of Intensive Care Unit (ICU) stay (in days)|in-hospital mortality (binary, yes/no)|Number of infected cases within the city of Basel|whole genome sequencing to study pathogen evolution (…	University Hospital, Basel, Switzerland|sciCORE University of Basel|Leonhard Med IT ETH Zurich|Swiss Institute of Bioinformatics	All	Child, Adult, Older Adult		10000	Other	Observational	Observational Model: Other|Time Perspective: Retrospective	2020-00769; qu20Egli2	April 9, 2020	2022-04-01	2022-04-01	April 17, 2020		August 27, 2021	Viollier AG, Allschwil, Switzerland|University Hospital Basel, Basel, Switzerland|Biozentrum University of Basel, Basel, Switzerland|sciCore University of Basel, Basel, Switzerland|Department of Biosystems Science and Engineering ETH Zurich, Basel, Switzerland|Swiss Institute of Bioinformatics, Geneva, Switzerland		https://ClinicalTrials.gov/show/NCT04351503
21	NCT04848493	National Project on Vaccines, COVID-19 and Frail Patients	VAX4FRAIL	Recruiting	No Results Available	COVID-19|Solid Tumor|Hematologic Diseases|Neurologic Disorder|Rheumatic Diseases	Biological: COVID-19 vaccines	SARS-CoV-2 vaccine immunization|anti-S antibodies immunological response|T cell immunological response|immunological response in different subgroups|impact of COVID-19 vaccination on patient health status|incidence of SARS-CoV-2 infection.	Azienda UnitÃ Sanitaria Locale Reggio Emilia|Fondazione IRCCS Istituto Nazionale dei Tumori, Milano|Istituto Clinico Humanitas|IRCCS San Raffaele|Regina Elena Cancer Institute|Istituto Nazionale per le Malattie Infettive "Lazzaro Spallanzani" IRCCS|University of Roma La Sapienza|Fondazione IRCCS Policlinico San Matteo di Pavia|Istituti Fisioterapici Ospitalieri|Istituto Tumori Giovanni Paolo II, …	All	18 Years and older Â (Adult, Older Adult)		1300	Other	Observational	Observational Model: Cohort|Time Perspective: Prospective	VAX4FRAIL study	April 19, 2021	July 20, 2021	April 20, 2022	April 19, 2021		April 22, 2021	IRCCS Azienda Ospedaliera Universitaria, Bologna, Bologhna, Italy|IRCCS Istituto Tumori Giovanni Paolo II, Bari, Italy|Ospedale Policlinico San Martino IRCCS, Genova, Italy|Foindazione IRCCS Istituto Neurologico Carlo Besta, Milano, Italy|Fondazione IRCCS Istituto Nazionale dei Tumori, Milano, Italy|IRCCS Istituto Clinico Humanitas, Milano, Italy|IRCCS Ospedale San Raffaele, Milano, Italy|Fondazi…		https://ClinicalTrials.gov/show/NCT04848493
22	NCT04278404	Pharmacokinetics, Pharmacodynamics, and Safety Profile of Understudied Drugs Administered to Children Per Standard of Care (POPS)	POPS or POP02	Recruiting	No Results Available	Coronavirus Infection (COVID-19)|Pulmonary Arterial Hypertension|Urinary Tract Infections in Children|Hypertension|Pain|Hyperphosphatemia|Primary Hyperaldosteronism|Edema|Hypokalemia|Heart Failure|Hemophilia|Menorrhagia|Insomnia|Pneumonia|Skin Infection|Arrythmia|Asthma in Children|Bronchopulmonary Dysplasia|Adrenal Insufficiency|Fibrinolysis; Hemorrhage|Attention Deficit Hyperactivity Disorder|M…	Drug: The POP02 study is collecting bodily fluid samples (i.e., whole blood, effluent samples) of children prescribed the following drugs of interest per standard of care:	Clearance (CL) or apparent oral clearance (CL/F) as measured by PK sampling|Volume of distribution (V) or apparent oral volume of distribution (V/F) as measured by PK sampling|Elimination rate constant (ke) as measured by PK sampling|Half-life (t1/2) as measured by PK sampling|Absorption rate constant (ka) as measured by PK sampling|AUC (area under the curve) as measured by PK sampling|Maximum co…	Duke University|The Emmes Company, LLC|Eunice Kennedy Shriver National Institute of Child Health and Human Development (NICHD)	All	up to 20 Years Â (Child, Adult)		5000	Other|Industry|NIH	Observational	Observational Model: Other|Time Perspective: Prospective	Pro00103838	March 5, 2020	April 24, 2024	April 24, 2024	February 20, 2020		December 15, 2021	Phoenix Children's Hospital, Phoenix, Arizona, United States|Arkansas Children's Hospital Research Institute, Little Rock, Arkansas, United States|University of California, Los Angeles, California, United States|Colorado University Denver, Aurora, Colorado, United States|Alfred I. DuPont Hospital for Children, Wilmington, Delaware, United States|University of Florida Jacksonville Shands Medical C…		https://ClinicalTrials.gov/show/NCT04278404

## Sheet: Silmitasertib
Rank	NCT Number	Title	Acronym	Status	Study Results	Conditions	Interventions	Outcome Measures	Sponsor/Collaborators	Gender	Age	Phases	Enrollment	Funded Bys	Study Type	Study Designs	Other IDs	Start Date	Primary Completion Date	Completion Date	First Posted	Results First Posted	Last Update Posted	Locations	Study Documents	URL
1	NCT04663737	Evaluating Safety, Pharmacokinetics and Clinical Benefit of Silmitasertib (CX-4945) in Subjects With Moderate COVID-19		Active, not recruiting	No Results Available	Covid19	Drug: Silmitasertib|Drug: SOC	Incidence of Treatment-Emergent Adverse Events [Safety and Tolerability]) within the CX-4945 Treatment Group assessed by CTCAE v5.0|Clinical Recovery associated with COVID-19 within the CX-4945 Treatment Group|Anti-Viral Activity of CX-4945|Maximum Plasma Concentration [Cmax] of CX-4945|Clinical Benefit of CX-4945 i.e. All-Cause Mortality|Clinical Benefit of CX-4945 i.e. Number of Respiratory Fai…	Chris Recknor, MD|Senhwa Biosciences, Inc.	All	18 Years and older Â (Adult, Older Adult)	Phase 2	20	Industry	Interventional	Allocation: Randomized|Intervention Model: Parallel Assignment|Masking: None (Open Label)|Primary Purpose: Treatment	CX4945 AV01-IIT	December 3, 2020	August 16, 2021	September 30, 2021	December 11, 2020		August 31, 2021	Center for Advanced Research and Education, Gainesville, Georgia, United States		https://ClinicalTrials.gov/show/NCT04663737
2	NCT04668209	Silmitasertib (CX-4945) in Patients With Severe Coronavirus Disease 2019 (COVID-19)	CX4945	Recruiting	No Results Available	Coronavirus	Drug: Silmitasertib	Incidence of Treatment Emergent Adverse Events [Safety and Tolerability]|To compare time to clinical recovery in CX-4945 treatment group evaluated from randomization through Day 28 as compared to the control arm.|To compare changes in clinical status of patients enrolled to CX-4945 treatment arm as compared to the control arm at Day 14 and Day 28.|To evaluate preliminary evidence of anti-viral ac…	University of Arizona|Senhwa Biosciences, Inc.	All	18 Years and older Â (Adult, Older Adult)	Phase 2	40	Other|Industry	Interventional	Allocation: Randomized|Intervention Model: Parallel Assignment|Masking: None (Open Label)|Primary Purpose: Treatment	CX4945-AV02-IIT	January 1, 2021	March 31, 2022	March 31, 2022	December 16, 2020		December 8, 2021	Banner University Medical Center Phoenix, Phoenix, Arizona, United States|Banner University Medical Center Tucson, Tucson, Arizona, United States		https://ClinicalTrials.gov/show/NCT04668209

## Sheet: Tofacitinib
Rank	NCT Number	Title	Acronym	Status	Study Results	Conditions	Interventions	Outcome Measures	Sponsor/Collaborators	Gender	Age	Phases	Enrollment	Funded Bys	Study Type	Study Designs	Other IDs	Start Date	Primary Completion Date	Completion Date	First Posted	Results First Posted	Last Update Posted	Locations	Study Documents	URL
3	NCT04750317	Efficacy and Safety of Tofacitinib in Patients With COVID-19 Pneumonia	TOFA-COV-2	Completed	No Results Available	COVID-19	Drug: Tofacitinib	Death|Mechanical ventilation	I.M. Sechenov First Moscow State Medical University	All	18 Years and older Â (Adult, Older Adult)	Phase 2	414	Other	Interventional	Allocation: Non-Randomized|Intervention Model: Parallel Assignment|Masking: None (Open Label)|Primary Purpose: Treatment	107892	May 11, 2020	August 1, 2020	September 1, 2020	February 11, 2021		February 15, 2021	Sechenov First Moscow State Medical University (Sechenov University) - University Clinical Hospital, Moscow, Russian Federation		https://ClinicalTrials.gov/show/NCT04750317
4	NCT04469114	Tofacitinib in Hospitalized Patients With COVID-19 Pneumonia		Completed	No Results Available	Covid19	Drug: Tofacitinib 10 mg|Drug: Placebo	Death or respiratory failure until Day 28|National Institute of Allergy and Infectious Diseases (NIAID) ordinal scale of disease severity at Day 14|Status of alive and not on mechanical ventilation or ECMO at Day 14 and 28 NIAID ordinal scale of disease severity at Day 14|Status of requiring supplemental oxygen at Day 28|Status of being alive and not hospitalized at Day 14 and 28|National Institu…	Hospital Israelita Albert Einstein|Pfizer	All	18 Years and older Â (Adult, Older Adult)	Phase 3	289	Other|Industry	Interventional	Allocation: Randomized|Intervention Model: Parallel Assignment|Masking: Quadruple (Participant, Care Provider, Investigator, Outcomes Assessor)|Primary Purpose: Treatment	34810620.0.1001.0071	September 16, 2020	January 9, 2021	January 9, 2021	July 13, 2020		August 9, 2021	Centro de Pesquisa ClÃ­nica do CoraÃ§Ã£o, Aracaju, Brazil|Hospital UniversitÃ¡rio SÃ£o Francisco de Assis Na ProvidÃªncia de Deu, BraganÃ§a Paulista, Brazil|Irmandade do Sr. Bom Jesus dos Passos da Santa Casa de MisericÃ³rdia de BraganÃ§a Paulista, BraganÃ§a Paulista, Brazil|Hospital do CoraÃ§Ã£o do Brasil, Brasilia, Brazil|Instituto de Pesquisa ClÃ­nica de Campinas, Campinas, Brazil|Hospital Reg…		https://ClinicalTrials.gov/show/NCT04469114
5	NCT04390061	TOFAcitinib Plus Hydroxycloroquine vs Hydroxycloroquine in Patients With COVID-19 Interstitial Pneumonia	TOFACoV-2	Not yet recruiting	No Results Available	Pneumonitis, Interstitial|COVID-19	Drug: Tofacitinib|Drug: Hydroxychloroquine	Prevention of severe Respiratory Failure requiring mechanical ventilation|Prevention of need of ICU admission|Prevention of COVID-19 related Deaths|Identification of predictors of outcome|Incidence of Treatment-Emergent Adverse Events	UniversitÃ Politecnica delle Marche|Azienda Ospedaliera Ospedali Riuniti Marche Nord|Ospedale Civile Santo Spirito, Pescara|UniversitÃ Magna Grecia, Catanzaro|ASST Papa Giovanni XXIII, Bergamo|Azienda Ospedaliero Universitaria Policlinico Umberto I, Roma|ASST Cremona, Cremona|Fondazione IRCCS CÃ Granda, Ospedale Maggiore Policlinico, Milano|Ospedale di Circolo e Fondazione Macchi, Varese	All	18 Years to 65 Years Â (Adult, Older Adult)	Phase 2	116	Other	Interventional	Allocation: Randomized|Intervention Model: Parallel Assignment|Masking: None (Open Label)|Primary Purpose: Treatment	2020-002035-30	2020-06-01	2020-09-01	2020-10-01	May 15, 2020		May 15, 2020			https://ClinicalTrials.gov/show/NCT04390061
6	NCT04332042	TOFAcitinib in SARS-CoV2 Pneumonia		Not yet recruiting	No Results Available	SARS-COv2 Related Interstitial Pneumonia	Drug: Tofacitinib	need of mechanical ventilation|need of admission in intensive care unit|death|rate of adverse events	UniversitÃ Politecnica delle Marche	All	18 Years to 65 Years Â (Adult, Older Adult)	Phase 2	50	Other	Interventional	Allocation: N/A|Intervention Model: Single Group Assignment|Masking: None (Open Label)|Primary Purpose: Treatment	TOFACoV	April 10, 2020	June 20, 2020	July 10, 2020	April 2, 2020		April 2, 2020	Ospedali Riuniti di Ancona, Ancona, Marche, Italy		https://ClinicalTrials.gov/show/NCT04332042
7	NCT05080218	COVID-19 VaccinE Response in Rheumatology Patients	COVER	Not yet recruiting	No Results Available	Rheumatoid Arthritis|Psoriatic Arthritis|Spondylarthritis	Drug: Upadacitinib|Drug: Abatacept|Drug: Secukinumab|Drug: Tofacitinib|Drug: TNF Inhibitor|Drug: Canakinumab Injection	Quantitative ratio post booster vs. pre-booster of IgG against SARS-CoV-2 using electrochemiluminescent (ECL) technology against the receptor binding domain (RBD) of spike protein, stratified by treatment arm|Number of patients with score change beyond the minimal clinically important difference in the Rheumatoid Arthritis Flare Questionnaire (for patients with RA/PsA) and the BASDAI (Axial Spond…	Jeffrey Curtis|University of Alabama at Birmingham|University of Nebraska|University of Pennsylvania|AbbVie|Bristol-Myers Squibb|Novartis|Eli Lilly and Company|Pfizer|Foundation for Advancing Science Technology Education and Research	All	18 Years to 85 Years Â (Adult, Older Adult)	Phase 4	1000	Other|Industry	Interventional	Allocation: Randomized|Intervention Model: Parallel Assignment|Masking: None (Open Label)|Primary Purpose: Prevention	COVER-Main	2021-10-01	2022-09-01	2022-12-01	October 15, 2021		October 26, 2021	University of Alabama at Birmingham, Birmingham, Alabama, United States|University of Nebraska Medical Center, Omaha, Nebraska, United States		https://ClinicalTrials.gov/show/NCT05080218
2	NCT04415151	Tofacitinib for Treatment of Moderate COVID-19	I-TOMIC	Terminated	No Results Available	COVID-19 Pneumonia	Drug: Tofacitinib 10 mg|Drug: Placebo	Disease Severity|Clinical improvement|Time to recovery|Time to clinical improvement|Clinical status|Mortality|Mechanical Ventilatory Support|Mechanical Ventilatory Support Duration|Freedom from mechanical ventilation|Adverse events|Additional intervention|Viral titer	Yale University	All	18 Years to 99 Years Â (Adult, Older Adult)	Phase 2	24	Other	Interventional	Allocation: Randomized|Intervention Model: Parallel Assignment|Masking: Triple (Participant, Care Provider, Investigator)|Primary Purpose: Treatment	2000027848	October 14, 2020	February 28, 2021	February 28, 2021	June 4, 2020		January 5, 2022	Yale New Haven Health System, New Haven, Connecticut, United States		https://ClinicalTrials.gov/show/NCT04415151
1	NCT04412252	Safety and Efficacy of Tofacitinib in Hospitalized Participants With COVID-19 Pneumonia Who Are Receiving Standard of Care Therapy		Withdrawn	No Results Available	COVID-19	Drug: Tofacitinib|Other: Placebo	Clinical status using ordinal scale|Status of alive and not using mechanical ventilation or extracorporeal membrane oxygenation (ECMO)|Status of discharged or not requiring supplemental oxygen|Mortality	Pfizer	All	18 Years to 99 Years Â (Adult, Older Adult)	Phase 2	0	Industry	Interventional	Allocation: Randomized|Intervention Model: Parallel Assignment|Masking: Double (Participant, Investigator)|Primary Purpose: Treatment	A3921377	July 6, 2020	September 16, 2020	October 18, 2020	June 2, 2020		July 31, 2020	Hartford Hospital (HH), Hartford, Connecticut, United States|University of Iowa Hospitals & Clinics Investigational Drug Services, Iowa City, Iowa, United States|University of Iowa, Iowa City, Iowa, United States|LSUHSC-Shreveport, Shreveport, Louisiana, United States|Ochsner LSU Health Shreveport Academic Medical Center, Shreveport, Louisiana, United States|University Hospitals Cleveland Medical…		https://ClinicalTrials.gov/show/NCT04412252
